# Supplementary material for: Mental health symptoms in Latin America during the first year of COVID-19 pandemic: a meta-analysis of prevalence and potential moderator variables
Source: bioRxiv or medRxiv preprint supplement (doi:10.1101/2023.02.18.23286126), 2023-02-19
Supplement: Supplementary file [file media-1.pdf]

## **Supplementary material**

### **Mental health symptoms in Latin-America during the first year of COVID-19 pandemic: a meta-analysis of prevalence and potential moderator variables**

Torrente, F.\*, Ailán, D., Del Cerro, E., Del Negro, J., Gorodetzky, B., Slonimshik, D.,  
Cetkovich-Bakmas, M., López, P.

\*Corresponding author. Email: [ftorrente@ineco.org.ar](mailto:ftorrente@ineco.org.ar)

#### **This PDF file includes:**

Search strategy

Table S1 to S4

Figures S1 to S8

References of included studies

## Search strategy

(SARS-CoV-2[Mesh] OR COVID-19[Mesh] OR Corona Virus[tiab] OR COVID-19[tiab] OR COVID19\*[tiab] OR 2019-nCoV[tiab] OR SARS-CoV-2[tiab] OR SARS-CoV2[tiab] OR (Pneumonia[tiab] AND Wuhan[tiab] AND 2019[tiab]) OR Coronavir\*[tiab] OR Coronovir\*[tiab] OR Virus Corona[tiab] OR Corono Virus[tiab] OR HCov\*[tiab] OR CV19\*[tiab] OR CV-19[tiab] OR N-Cov[tiab]) AND (Mental Health[Mesh] OR Mental Health[tiab] OR Depressive Disorder[Mesh] OR Depressi\*[tiab] OR Sadness[tiab] OR Anxiety[Mesh] OR Anxiousness[tiab] OR Anxiet\*[tiab] OR Distress[tiab] OR Angst[tiab] OR Nervousness[tiab] OR Stress Disorders, Traumatic[Mesh] OR Stress\*[tiab] OR Sleep Initiation and Maintenance Disorders[Mesh] OR Insomn\*[tiab] OR Sleep\*[tiab] OR Early Awak\*[tiab] OR DIMS[tiab]) AND (Americas[MeSH Terms:noexp] OR America\*[tiab] OR Latin America[Mesh] OR Latin America\*[tiab] OR Latinamerica\*[tiab] OR Latinoamerica\*[tiab] OR Latin\*[tiab] OR Hispanic Americans[Mesh] OR Hispanic America\*[tiab] OR Hispanoamerica\*[tiab] OR Iberoamerica\*[tiab] OR Ibero Americ\*[tiab] OR Panamerican\*[tiab] OR Central America[Mesh] OR Central America\*[tiab] OR Centroamerica\*[tiab] OR Mesoamerica\*[tiab] OR Meso America\*[tiab] OR Middle America\*[tiab] OR South America[Mesh] OR South America\*[tiab] OR Southamerica\*[tiab] OR Sudamerica\*[tiab] OR “America del sur”[tiab] OR Caribbean Region[Mesh] OR Caribbean[tiab] OR Caribe\*[tiab] OR West Indies[Mesh] OR West Indi\*[tiab] OR Antill\*[tiab] OR Indians, South American[Mesh] OR Indians, Central American[Mesh] OR Amerindian\*[tiab] OR Indians[tiab] OR American Indian\*[tiab] OR Native America\*[tiab] OR Patagoni\*[tiab] OR Andes[tiab] OR Andean\*[tiab] OR Amazon\*[tiab] OR Argentin\*[ad] OR Argentin\*[tiab] OR Argentina[pl] OR Bolivia\*[ad] OR Bolivia\*[tiab] OR Bolivia[pl])

OR Brazil\*[ad] OR Brasil\*[ad] OR Brazil\*[tiab] OR Brasil\*[tiab] OR Brazil[pl] OR  
Colombia\*[ad] OR Colombia\*[tiab] OR Colombia[pl] OR Chile\*[ad] OR Chile\*[tiab]  
OR Chile[pl] OR Ecuador\*[ad] OR Ecuador\*[ad] OR Ecuador\*[tiab] OR Ecuador[pl]  
OR Guiana\*[ad] OR Guiana\*[tiab] OR French Guiana[pl] OR Guyan\*[ad] OR  
Guyan\*[tiab] OR Guyana[pl] OR Paraguay\*[ad] OR Paraguay\*[tiab] OR Paraguay[pl]  
OR Peru\*[ad] OR Peru\*[tiab] OR Peru[pl] OR Surinam\*[ad] OR Surinam\*[tiab] OR  
Suriname[pl] OR Uruguay\*[ad] OR Uruguay\*[tiab] OR Uruguay[pl] OR Venez\*[ad]  
OR Venez\*[tiab] OR Venezuela[pl] OR Belize\*[ad] OR Belize\*[tiab] OR Belize[pl]  
OR Costa Ric\*[ad] OR Costarric\*[ad] OR Costaric\*[ad] OR Costa Ric\*[tiab] OR  
Costarric\*[tiab] OR Costaric\*[tiab] OR Costa Rica[pl] OR Salvador\*[ad] OR  
Salvador\*[tiab] OR El Salvador[pl] OR Guatemal\*[ad] OR Guatemal\*[tiab] OR  
Guatemala[pl] OR Hondur\*[ad] OR Hondur\*[tiab] OR Honduras[pl] OR Nicaragu\*[ad]  
OR Nicaragu\*[tiab] OR Nicaragua[pl] OR Panam\*[ad] OR Panam\*[tiab] OR  
Panama[pl] OR Mexico[Mesh] OR Mexic\*[ad] OR Mexic\*[tiab] OR Mejjic\*[tiab] OR  
Mexico[pl] OR Cuba\*[ad] OR Cuba\*[tiab] OR Cuba[pl] OR Dominic\*[ad] OR  
Dominic\*[tiab] OR Dominican Republic[pl] OR Haiti\*[ad] OR Haiti\*[tiab] OR  
Haiti[pl] OR Jamaic\*[ad] OR Jamaic\*[tiab] OR Jamaica[pl] OR Puerto Rico[Mesh] OR  
Puerto Ric\*[tiab] OR Puertoric\*[tiab] OR Puertoric\*[tiab])

**Table S1. Description of included studies**

|    | Authors               | Country   | Data collection period | N                                                                                            | Inclusion criteria | Sampling    | Assessment tools                 | Design          | Time points | Results                                                                                                                                                                                                                                                                   | Lockdown |
|----|-----------------------|-----------|------------------------|----------------------------------------------------------------------------------------------|--------------------|-------------|----------------------------------|-----------------|-------------|---------------------------------------------------------------------------------------------------------------------------------------------------------------------------------------------------------------------------------------------------------------------------|----------|
| 1. | Antiporta, et al.2021 | Peru      | 5/4/2020 - 5/18/20     | Total sample: 64493.<br>Final sample: 57250                                                  | 18 years or older  | Convenience | PHQ-9                            | Cross-sectional | -           | Depressive symptoms:<br>Participants with previous mental health diagnosis 59% (95% CI 56.7, 61.4%) /<br>Adults without a prior diagnosis 30% (95% CI 29.1, 30.9%) / Non-responders 60.3% (95% CI 54, 66.3%)                                                              | Yes      |
| 2. | Badellino, et al.2021 | Argentina | 3/29/2020 - 4/12/2020  | Total sample: 2051.<br>Final sample: 1985.<br>Final sample without health care workers: 1659 | 18 years or older  | Convenience | GAD-7<br>PHQ-9<br>PSS-10<br>PSQI | Cross-sectional | -           | Anxiety symptoms<br>Mild: 38.1% (N= 632)<br>Moderate: 11.2% (N= 185)<br>Severe: 3.5% (N= 59)<br><br>Depressive symptoms<br>Mild: 22.1% (N= 366)<br>Moderate: 19.7% (N= 327)<br>Severe: 6.3% (N=105)<br><br>Stress<br>Yes: 23.6% (N=391)<br><br>Sleep quality<br>97 / 5000 | Yes      |

|    | Authors                         | Country   | Data collection period                                           | N                                         | Inclusion criteria                                   | Sampling    | Assessment tools            | Design          | Time points                        | Results                                                                                                                                                                                                                                                                                                                                                | Lockdown |
|----|---------------------------------|-----------|------------------------------------------------------------------|-------------------------------------------|------------------------------------------------------|-------------|-----------------------------|-----------------|------------------------------------|--------------------------------------------------------------------------------------------------------------------------------------------------------------------------------------------------------------------------------------------------------------------------------------------------------------------------------------------------------|----------|
| 3. | Badellino, et al.2021           | Argentina | T1:<br>3/29/2020-<br>4/12/2020<br>T2:<br>5/23/2020-<br>6/12/2020 | T1 (N: 1985).<br>T2 (N: 2839)             | 18 years or older                                    | Convenience | PHQ-9<br>PSQI               | Longitudinal    | T1 and T2 during COVID-19 pandemic | Depressive symptoms<br>T1: 24.3% (N: 482)<br>T2: 47.8% (N: 135)<br><br>Conciliation insomnia<br>T1: 51.1% (N: 1023)<br>T2: 0.5 % (N: 1719)<br><br>Night awakenings<br>T1: 54.3% (N: 1078)<br>T2: 4.4 % (N: 1546)<br><br>Sleep < 7 hs<br>T1: 27.8 % (N: 551)<br>T2: 70% (N: 1987)<br><br>Poor sleep quality<br>T1: 23.1% (N: 459)<br>T2: 32.1% (N: 912) | Yes      |
| 4. | Bohn, et al.2021                | Brazil    | June 2020                                                        | Total sample: 1453.<br>Final sample: 1123 | 60 years or older, enrolled in the community program | Convenience | GDS-15                      | Cross-sectional | -                                  | Depressive symptoms: 30.4%                                                                                                                                                                                                                                                                                                                             | No       |
| 5. | Caballero-Domínguez, et al.2020 | Colombia  | 3/30/2020 - 4/8/2020                                             | 700                                       | Residents of Colombia                                | Convenience | WHO-5<br>AIS                | Cross-sectional | -                                  | Depressive symptoms: 61.1% (N: 428)<br><br>Insomnia: 42% (N: 294)                                                                                                                                                                                                                                                                                      | Yes      |
| 6. | Calegaro, et al. 2021           | Brazil    | 4/22/2021 - 5/8/2021                                             | 3587                                      | 18 years or older                                    | Snowball    | AUDIT-C<br>DASS-21<br>PCL-5 | Cross-sectional | -                                  | Stress: 58.4%<br>Anxiety: 52.3%<br>Depression: 61.2%<br>PTSD: 24.5%                                                                                                                                                                                                                                                                                    | -        |

|    | Authors                      | Country | Data collection period | N                                       | Inclusion criteria                                                                                                                  | Sampling    | Assessment tools | Design          | Time points                                                      | Results                                                                                                                                                                                                         | Lockdown |
|----|------------------------------|---------|------------------------|-----------------------------------------|-------------------------------------------------------------------------------------------------------------------------------------|-------------|------------------|-----------------|------------------------------------------------------------------|-----------------------------------------------------------------------------------------------------------------------------------------------------------------------------------------------------------------|----------|
| 7. | Campos, et al.2020           | Brazil  | 5/18/2020 - 6/25/2020  | 13494                                   | 18 years or older                                                                                                                   | Convenience | DASS-21          | Cross-sectional | -                                                                | Depressive symptoms<br>Mild: 14.5%<br>Moderate: 21.8%<br>Severe: 25%<br><br>Anxiety symptoms<br>Mild: 8.5%<br>Moderate: 19.2%<br>Severe: 16.5%<br><br>Stress<br>Mild: 15.5%<br>Moderate: 16.9%<br>Severe: 18.4% | Yes      |
| 8. | Caycho-Rodríguez, et al.2021 | Peru    | 8/3/2020 - 8/31/2020   | 274                                     | -                                                                                                                                   | Convenience | MHI-5<br>PHQ-2   | Cross-sectional | -                                                                | Depressive symptoms 30.7%<br>Generalized Anxiety symptoms 25.2%                                                                                                                                                 | Yes      |
| 9. | Cerecero-Garcia, et al.2021  | Mexico  | 4/20/2020 - 4/27/2020  | Total sample: 881.<br>Final sample: 595 | Men who have sex with transgender men and women. Some of them had participated in a project of Prophylaxis prior to exposure to HIV | Convenience | CESD-10          | Longitudinal    | T1 and T2 during COVID-19 pandemic (Before and during lockdown). | Depressive symptoms<br><i>Enrolled in ImPrEP study</i><br>During lockdown: 51.9%<br>Before lockdown: 8.6%.                                                                                                      | Yes      |

|     | Authors                     | Country                         | Data collection period  | N                                              | Inclusion criteria                                                              | Sampling    | Assessment tools | Design          | Time points | Results                                                                                                                                                                                                                                                                                 | Lockdown |
|-----|-----------------------------|---------------------------------|-------------------------|------------------------------------------------|---------------------------------------------------------------------------------|-------------|------------------|-----------------|-------------|-----------------------------------------------------------------------------------------------------------------------------------------------------------------------------------------------------------------------------------------------------------------------------------------|----------|
| 10. | Cheung, et al. 2021         | International, including Brazil | 3/24/2020 - 4/30/2020   | Total sample: 20,958<br>Brazilian sample: 8375 | 18 years or older                                                               | Convenience | PHQ-9            | Cross-sectional | -           | Brazil (n= 8375)<br>Suicidal ideation: 1.5%<br>Not at all: 92.4% (n= 7,740)<br>Several days: 5.1% (n= 430)<br>More than half of the days: 1% (n= 83)<br>Almost every day: 1.5% (n= 122)                                                                                                 | -        |
| 11. | Côrrea, et al.2020          | Brazil                          | 5/16/2020 - 5/26/2020   | 213                                            | 18 years or older. Be a yoga practitioner with a minimum of 6 months experience | Snowball    | DASS-21          | Cross-sectional | -           | Stress<br>Mild: 26.3%<br>Moderate: 15%<br>Severe: 9.4%<br>Extremely severe: 2.8%<br><br>Anxiety symptoms<br>Mild: 4.2%<br>Moderate: 15.5%<br>Severe: 4.2%<br>Extremely severe 8%<br><br>Depressive symptoms<br>Mild: 10.3%<br>Moderate: 15.5%<br>Severe: 4.7%<br>Extremely severe: 3.3% | -        |
| 12. | Cortés-Álvarez, et al.2020  | Mexico                          | 3/20/2020 - 4/5/2020    | 1105                                           | 18 years or older                                                               | Snowball    | IESR<br>DASS-21  | Cross-sectional | -           | Distress<br>Moderate to severe: 50.3%<br><br>Depressive symptoms<br>Moderate to severe: 15.7%<br><br>Anxiety symptoms<br>Moderate to severe: 22.6%<br><br>Stress<br>Moderate to severe: 19.8%                                                                                           | Yes      |
| 13. | da Silva Júnior, et al.2021 | Brazil                          | 10/27/2020 - 12/11/2020 | 5879                                           | University students over 18 years old                                           | Convenience | GAD-7            | Cross-sectional | -           | Generalized anxiety symptoms: 44.59%                                                                                                                                                                                                                                                    | -        |

|     | Authors                                  | Country   | Data collection period                                | N                                                                 | Inclusion criteria                                                            | Sampling           | Assessment tools                     | Design          | Time points                                                        | Results                                                                                                                                              | Lockdown |
|-----|------------------------------------------|-----------|-------------------------------------------------------|-------------------------------------------------------------------|-------------------------------------------------------------------------------|--------------------|--------------------------------------|-----------------|--------------------------------------------------------------------|------------------------------------------------------------------------------------------------------------------------------------------------------|----------|
| 14. | De Boni, et al.2021                      | Brazil    | 20/4/20-20/5/20                                       | Total sample: 22785 (Brazil and Spain)<br>Brazilian sample: 19256 | 18 years or older                                                             | Snowball           | AUDIT-C                              | Cross-sectional |                                                                    | Risky drinking: 45.6%                                                                                                                                | -        |
| 15. | de Camargo, et al.2021                   | Brazil    | April to May 2020                                     | 2000                                                              | 18 years or older                                                             | Convenience        | Kessler psychological distress scale | Cross-sectional | -                                                                  | Distress: 35.9%                                                                                                                                      | -        |
| 16. | de Souza Costaa, et al. 2021 (Pre-print) | Brazil    | 5/9/2020 - 6/30/2020                                  | 5635                                                              | 18 years or older                                                             | Convenience        | GSI                                  | Cross-sectional | -                                                                  | High average psychological distress: 1448 (25.1)<br>Very high psychological distress: 351 (6.3)                                                      | -        |
| 17. | Del Brutto, et al.2021                   | Ecuador   | T1: 2019 (Pre-COVID-19)<br>T2: 2020 (During COVID-19) | 2019: 673.<br>2020: 639                                           | Atahualpa residents over 40 years old participating in the Atahualpa project. | Convenience        | PSQI                                 | Longitudinal    | T1: Pre-COVID period (2019)<br>T2: during COVID-19 pandemic (2020) | Poor sleep: 49%<br><br>185 (29%) individuals at baseline, and 311 (49%) at follow-up PSQI, were “poor sleepers”.                                     | -        |
| 18. | Etchevers, et al. 2021                   | Argentina | T1:3/27/20 - 3/31/20<br>T2: 5/8/2020 - 5/12/2020      | T1: 2631<br>T2: 2068                                              | No information                                                                | Convenience sample | SCL-27                               | Longitudinal    | T1 and T2 during COVID-19 pandemic                                 | Risk of Mental Disorder<br>T1: 4.86%<br>T2: 7.2%<br><br>Sleep problems<br>T1: 73.7%<br>T2: 76.02%<br><br>Suicidal thoughts<br>T1: 4.22%<br>T2: 6.53% | Yes      |
| 19. | Fernández, et al.2020                    | Argentina | 4/1/2020 - 4/17/2020                                  | 4408                                                              | 18 years or older                                                             | Convenience        | BSI-53                               | Cross-sectional | -                                                                  | Phobic anxiety: 41.3%<br>Anxiety symptoms: 31.8%<br>Depressive symptoms: 27.5%<br>Distress: 27.1%                                                    | Yes      |



|     | Authors                             | Country  | Data collection period | N                                      | Inclusion criteria  | Sampling    | Assessment tools                                                                                                | Design          | Time points | Results                                                                                                             | Lockdown                                                                                                                        |
|-----|-------------------------------------|----------|------------------------|----------------------------------------|---------------------|-------------|-----------------------------------------------------------------------------------------------------------------|-----------------|-------------|---------------------------------------------------------------------------------------------------------------------|---------------------------------------------------------------------------------------------------------------------------------|
| 20. | Ferreira, et al. 2021               | Brazil   | May and June of 2020   | Total sample: 1316. Final sample: 1130 | 18 years or older   | Snowball    | DASS-21                                                                                                         | Cross-sectional | -           | Severe depressive symptoms:<br>Total sample: 17.43%<br>In social distance: 19.2%<br>Not in social distancing: 13.2% | Yes                                                                                                                             |
| 21. | Feter, et al.2021                   | Brazil   | 6/22/2020 - 7/23/2020  | 1767                                   | -                   | Convenience | HADS                                                                                                            | Cross-sectional | -           | Anxiety symptoms: 51.3%<br>Depressive symptoms: 35%                                                                 | During the recruitment phase, up to 73.4% of state population were in the second highest level of social distancing restriction |
| 22. | Filgueiras & Stults-Kolehmainen2021 | Brazil   | 3/18/2020 - 3/22/2020  | 1460                                   | 18 years or older   | Convenience | Perceived Stress Scale-10<br>Filgueiras Depression Inventory, State and Trait Anxiety Inventory: state subscale | Cross-sectional | -           | Acute stress: 6.9%<br>Depressive symptoms: 4.2%<br>Anxiety symptoms: 8,8% (8.9 women and 8.4 men)                   | Yes                                                                                                                             |
| 23. | García-Espinosa, et al. 2021        | Colombia | -                      | 1149                                   | University students | Convenience | GAD-7/<br>PHQ-9                                                                                                 | Cross-sectional | -           | Depressive symptoms: 47.08%<br>Anxiety symptoms: 27.06%                                                             | -                                                                                                                               |

|     | Authors                        | Country   | Data collection period | N                                         | Inclusion criteria | Sampling    | Assessment tools                                              | Design          | Time points | Results                                                                                                                                                                                                                                   | Lockdown           |
|-----|--------------------------------|-----------|------------------------|-------------------------------------------|--------------------|-------------|---------------------------------------------------------------|-----------------|-------------|-------------------------------------------------------------------------------------------------------------------------------------------------------------------------------------------------------------------------------------------|--------------------|
| 24. | González Ramírez, et al. 2020  | Mexico    | 3/27/2020 - 4/2/2020   | Total sample: 4183.<br>Final sample: 3932 | 18 years or older  | Convenience | IESR                                                          | Cross-sectional | -           | Posttraumatic stress symptoms: 27.7%                                                                                                                                                                                                      | -                  |
| 25. | Goularte, et al. 2021          | Brazil    | 5/20/2020 - 6/14/2020  | 1996                                      | 18 years or older  | Convenience | IESR, PROMIS Short Form v1.0 - Depression 8a), PROMIS anxiety | Cross-sectional | -           | Anxiety symptoms: 81.9%<br>Depressive symptoms: 68%<br>Sleep problems: 55.3%                                                                                                                                                              | -.                 |
| 26. | Guzmán-Muñoz, et al. 2020      | Chile     | 5/30/2020 - 6/6/2020   | 1082                                      | 18 years or older  | Convenience | SF-36                                                         | Cross-sectional | -           | Mental health problems: 49.7%                                                                                                                                                                                                             | -                  |
| 27. | Krüger-Malpartida, et al. 2020 | Peru      | -                      | 400                                       | 18 years or older  | Convenience | PHQ-9, GAD-7, and CPDI                                        | Cross-sectional | -           | Anxiety symptoms<br>Minimal: 49.30%<br>Mild: 40%<br>Moderate: 7.2%<br>Severe: 3.5%<br><br>Depressive symptoms<br>Minimal: 48.5%<br>Mild: 29.5%<br>Moderate: 12%<br>Severe: 10%<br><br>Peritraumatic stress<br>Mild: 35.5%<br>Severe: 9.3% | No. Post-lockdown. |
| 28. | López Steinmetz, et al. 2020   | Argentina | 3/30/2020 - 5/23/2020. | 1100                                      | 18 years or older  | Convenience | BDI-II/ STAI                                                  | Cross-sectional | -           | Depressive symptoms: 29.64%<br>State anxiety: 48.55%<br>Trait anxiety: 47.91%                                                                                                                                                             | Yes                |

|     | Authors                     | Country   | Data collection period | N    | Inclusion criteria | Sampling    | Assessment tools | Design       | Time points                                                                                                                                  | Results                                                                                                                                                                                                                                                                                                                                                                                                                                                                                                                                                                                                                                | Lockdown |
|-----|-----------------------------|-----------|------------------------|------|--------------------|-------------|------------------|--------------|----------------------------------------------------------------------------------------------------------------------------------------------|----------------------------------------------------------------------------------------------------------------------------------------------------------------------------------------------------------------------------------------------------------------------------------------------------------------------------------------------------------------------------------------------------------------------------------------------------------------------------------------------------------------------------------------------------------------------------------------------------------------------------------------|----------|
| 29. | López Steinmetz, et al.2021 | Argentina | 5/17/2020 - 6/30/2020  | 1492 | 18 years or older  | Convenience | BDI/<br>STAI     | Longitudinal | T1, T2; and T3 during COVID-19 pandemic.<br>T1: 17th to 29th March 2020.<br>T2: 30th March to 8th May 2020.<br>T2: 9th May to 30th June 2020 | <p>Depressive symptoms</p> <p>1° sub-period (n = 866)<br/><i>1° measurement: 58.66%</i><br/><i>Follow-up: 54.62%</i></p> <p>2° sub-period (n = 298)<br/><i>1° measurement: 60.40%</i><br/><i>Follow-up: 62.42%</i></p> <p>3° sub-period (n = 328)<br/><i>1° measurement: 55.49%</i><br/><i>Follow-up: 57.62%</i></p> <p>Anxiety symptoms</p> <p>1° sub-period (n = 866)<br/><i>1° measurement: 52.54%</i><br/><i>Follow-up: 50.23%</i></p> <p>2° sub-period (n = 298)<br/><i>1° measurement: 55.03%</i><br/><i>Follow-up: 54.36%</i></p> <p>3° sub-period (n = 328)<br/><i>1° measurement: 53.05%</i><br/><i>Follow-up: 49.08%</i></p> | Yes      |

|     | Authors                    | Country   | Data collection period                               | N                       | Inclusion criteria  | Sampling    | Assessment tools     | Design       | Time points                                                                                 | Results                                                                                                                                                                                                                                                                                                                                                                                                                                                                       | Lockdown |
|-----|----------------------------|-----------|------------------------------------------------------|-------------------------|---------------------|-------------|----------------------|--------------|---------------------------------------------------------------------------------------------|-------------------------------------------------------------------------------------------------------------------------------------------------------------------------------------------------------------------------------------------------------------------------------------------------------------------------------------------------------------------------------------------------------------------------------------------------------------------------------|----------|
| 30. | López-Morales, et al.2021  | Argentina | T1: 3/22-25/2020.<br>T2: 4/3-9/20<br>T3: 5/6-10/2020 | T1 and T2: 204. T3: 201 | Women over 18 years | Convenience | BDI-II<br>STAI       | Longitudinal | T1, T2, and T3 during COVID-19 pandemic.<br>T1: 22-25/3/20<br>T2: 3-9/4/20<br>T3: 6-10/5/20 | <p>Pregnant women<br/>Depressive symptoms</p> <p>T1<br/>Mild: 12.7%<br/>Moderate: 8.8%<br/>Severe: 0%</p> <p>T2<br/>Mild: 23.5%<br/>Moderate: 7.1%<br/>Severe: 7.1%</p> <p>T3<br/>Mild: 20.8%<br/>Moderate: 19.8%<br/>Severe: 12.9%</p> <p>Not pregnant women<br/>Depressive symptoms</p> <p>T1<br/>Mild: 11.1%<br/>Moderate: 2.0%<br/>Severe: 0%</p> <p>T2<br/>Mild: 16.2%<br/>Moderate: 6.1%<br/>Severe: 0%</p> <p>T3<br/>Mild: 19.0%<br/>Moderate: 6.0%<br/>Severe: 4%</p> | Yes      |
| 31. | Loret de Mola, et al. 2021 | Brazil    | T1: During 2019<br>T:2 May to July 2020              | 1136                    | Brazilian mothers   | Convenience | EPDS<br>GAD-7<br>IES | Longitudinal | T1: Pre-COVID period (2019)<br>T2: during COVID-19 pandemic (2020)                          | <p>Stress (moderate to severe): 40.5%</p> <p>Depressive symptoms: 29.3%</p> <p>Generalized anxiety symptoms: 25.9%</p>                                                                                                                                                                                                                                                                                                                                                        | -        |

|     | Authors                   | Country   | Data collection period                                              | N                                        | Inclusion criteria                                  | Sampling    | Assessment tools                            | Design          | Time points                                                        | Results                                                                                                                                                                                                                                                                                         | Lockdown |
|-----|---------------------------|-----------|---------------------------------------------------------------------|------------------------------------------|-----------------------------------------------------|-------------|---------------------------------------------|-----------------|--------------------------------------------------------------------|-------------------------------------------------------------------------------------------------------------------------------------------------------------------------------------------------------------------------------------------------------------------------------------------------|----------|
| 32. | Martínez, et al. 2020     | Brazil    | 5/11/2020 - 5/15/2020                                               | Total sample 2230.<br>Final sample: 1017 | 18 years or older                                   | Convenience | HADS                                        | Cross-sectional | -                                                                  | Depressive symptoms: 48.8%<br>Anxiety symptoms: 82.6%                                                                                                                                                                                                                                           | Yes      |
| 33. | Meda-Lara, et al. 2021    | Mexico    | 4/2/2020 - 5/4/2020                                                 | 666                                      | -                                                   | Convenience | DASS-21<br>ESR                              | Cross-sectional | -                                                                  | Depressive symptoms<br>Mild: 8.71%<br>Moderate: 6.61%<br>Severe: 3.45%<br>Extremely severe: 3.6%<br><br>Anxiety symptoms<br>Mild: 5.4%<br>Moderate: 5.86%<br>Severe: 3.3%<br>Extremely severe: 6.16%<br><br>Stress<br>Mild: 16.22%<br>Moderate: 6.31%<br>Severe: 3.6%<br>Extremely severe: 1.8% | -        |
| 34. | Miranda, et al. 2021      | Argentina | May to July 2020                                                    | 305                                      | Women over 18 years of age in the postpartum period | Convenience | ISI<br>PDSS-SF                              | Cross-sectional | -                                                                  | Depressive symptoms: 37%<br>Insomnia: 46%                                                                                                                                                                                                                                                       | Yes      |
| 35. | Montero Doig, et al. 2021 | Peru      | T1: Pre-pandemic period<br>T2: Pandemic period<br>Unspecified dates | 150                                      | Adult population of the south east of Madre de Dios | Convenience | Anxiety state (A/S) and Anxiety trait (A/T) | Longitudinal    | T1: Pre-COVID period (2019)<br>T2: during COVID-19 pandemic (2020) | State anxiety: 65%.<br>Before COVID-19<br>Mild anxiety: 26.67%<br>Moderate anxiety: 46.67%<br>Severe anxiety: 26.67%<br>During COVID-19<br>Mild anxiety: around 0%<br>Moderate anxiety: 53.33%<br>Severe anxiety: 46.67%                                                                        | Yes      |

|     | Authors                       | Country  | Data collection period | N                                      | Inclusion criteria                                                                                                                                             | Sampling    | Assessment tools                                                   | Design          | Time points | Results                                                                                                                    | Lockdown |
|-----|-------------------------------|----------|------------------------|----------------------------------------|----------------------------------------------------------------------------------------------------------------------------------------------------------------|-------------|--------------------------------------------------------------------|-----------------|-------------|----------------------------------------------------------------------------------------------------------------------------|----------|
| 36. | Monterrosa-Blanco, et al.2021 | Colombia | 5/1/2020 - 5/30/2020   | 984                                    | Women between 40 to 59 years                                                                                                                                   | Convenience | Jong Gierveld Loneliness Scale                                     | Cross-sectional | -           | Emotional loneliness 44% (n= 433)<br>Social loneliness 42.2% (n= 415)<br>General loneliness 44.5% (n= 438)                 | Yes      |
| 37. | Monterrosa-Castro, et al.2021 | Colombia | 6/1/2020 - 6/5/2020    | Total sample 1185. Final sample: 1133  | Women aged between 40-79 years                                                                                                                                 | Convenience | DJGLS<br>MRS<br>FCV-19S-5<br>CAS<br>Francis-5<br>Religiosity Scale | Cross-sectional | -           | Emotional loneliness: 43.1% (n=489)<br>Social loneliness: 39.9% (n=452)<br>General loneliness: 43.3% (n=491)               | Yes      |
| 38. | Naranjo-Hernández, et al.2021 | Cuba     | May to June 2020       | 100                                    | Functional older adults                                                                                                                                        | Convenience | HAD<br>EEP-10-C                                                    | Cross-sectional | -           | Mild anxiety: 73% (n=73)<br>Severe anxiety: 21% (n=21)<br><br>Mild depression: 50% (n=50)<br>Severe depression: 24% (n=24) | Yes      |
| 39. | Nomura, et al.2021            | Brazil   | 6/1/2020 - 8/31/2020   | Total sample: 1683. Final sample: 1662 | Maternal age more than 18 years; gestational age more than 36 weeks at childbirth; single alive newborn without malformations; and absence of mental disorders | Convenience | BAI                                                                | Cross-sectional | -           | Mild anxiety: 22.4% (n=372)<br>Moderate anxiety: 13.9% (n=231)<br>Severe anxiety: 9.6% (n=159)                             | Yes      |
| 40. | Oblitas Gonzales, et al.2020  | Peru     | 3/16/2020 - 6/30/2020  | 67                                     | 18 years or older                                                                                                                                              | Convenience | EAA                                                                | Cross-sectional | -           | Mild anxiety: 20.9% (n=14)<br>Moderate anxiety: 13.4% (n=9)<br>Severe anxiety: 9% (n=6)                                    | Yes      |

|     | Authors                   | Country                              | Data collection period | N                                                                    | Inclusion criteria                                                                                              | Sampling    | Assessment tools       | Design          | Time points | Results                                                                                                                                  | Lockdown                   |
|-----|---------------------------|--------------------------------------|------------------------|----------------------------------------------------------------------|-----------------------------------------------------------------------------------------------------------------|-------------|------------------------|-----------------|-------------|------------------------------------------------------------------------------------------------------------------------------------------|----------------------------|
| 41. | Paico, et al.2021         | Peru                                 | -                      | 203                                                                  | Post graduate student                                                                                           | Convenience | STAI<br>AQ             | Cross-sectional | -           | (State-Anxiety%)<br>Above average: 15.3%<br>Elevated: 84.7%<br><br>(Trait-Anxiety%)<br>Above average: 44.3%<br>Elevated: 9.9%            | Yes                        |
| 42. | Passos, et al.2020        | Brazil and Portugal                  | 5/27/2020 - 7/8/2020   | Total sample: 550. Brazilian sample: 289                             | 18 years or older                                                                                               | Snowball    | SWLS<br>GAD-7<br>PHQ-2 | Cross-sectional | -           | <i>-Brazil-</i><br><br>Anxiety: 74.7% (n=216)<br>Depression: 26.6% (n=77)                                                                | Variation between regions. |
| 43. | Pereira-Ávila, et al.2021 | Brazil                               | 4/17/2020 - 5/15/2020  | 900                                                                  | Individuals aged 60 or over were adopted as inclusion criteria, and foreigners residing in Brazil were excluded | Convenience | PHQ-9                  | Cross-sectional | -           | Depressive symptoms:<br>91,9% mild depressive symptoms<br>2% moderately severe symptoms<br>1,4% symptoms of severe depression            | Yes                        |
| 44. | Pérez-Cano, et al.2020    | Mexico                               | 3/22/2020 - 3/30/2020  | 613                                                                  | 18 years or older                                                                                               | Convenience | DASS-21<br>STAI        | Cross-sectional | -           | Depression: 41.3%<br>Moderate/Severe Anxiety: 48.8%<br>State-Anxiety: 42%                                                                | -                          |
| 45. | Porter, et al.2021        | Peru<br>Ethiopia<br>India<br>Vietnam | August to October 2020 | Total sample: 9730. Final sample: 8988. <b>Peruvian sample:</b> 1887 | 18 years or older                                                                                               | Convenience | PHQ-8<br>GAD-7         | Cross-sectional | -           | <i>-Peru-</i><br><br>Mild depression: 32%<br>Moderate/severe depression: 9.6%<br><br>Mild anxiety: 41%<br>Moderate/severe anxiety: 13.5% | -                          |

|     | Authors                     | Country                | Data collection period | N                                        | Inclusion criteria                                                 | Sampling    | Assessment tools                                | Design          | Time points | Results                                                                                                                                                                                                                                                  | Lockdown |
|-----|-----------------------------|------------------------|------------------------|------------------------------------------|--------------------------------------------------------------------|-------------|-------------------------------------------------|-----------------|-------------|----------------------------------------------------------------------------------------------------------------------------------------------------------------------------------------------------------------------------------------------------------|----------|
| 46. | Puccinelli, et al.2021      | Brazil                 | 6/2/2020 - 6/12/2020   | Total sample: 2140. Final sample: 1853   | 18 years or older                                                  | Convenience | IPAQ<br>PHQ-9<br>GAD-7                          | Cross-sectional | -           | Mild depression: 36.2% (n=670)<br>Moderate depression: 16.4% (n=304)<br>Moderate-Severe depression: 8,4% (n=155)<br>Severe depression: 4.8% (n=89)<br><br>Mild anxiety: 36.4% (n=674)<br>Moderate anxiety: 14.3% (n=265)<br>Severe anxiety: 8.9% (n=164) | No       |
| 47. | Puccinelli, et al.2021      | Brazil and Switzerland | 6/2/2020 - 6/12/2020   | Total sample: 114. Brazilian sample: 57. | 18 years or older                                                  | Convenience | IPAQ<br>PHQ-9<br>GAD-7                          | Cross-sectional | -           | Mild depression: 29.8% (45.6% Brazil, 14% Suiza)<br>Moderate/Severe depression: 14.9% (22.8% Brazil, 7% Suiza)<br><br>Mild anxiety: 33.3% (47.4% Brazil, 19.3% Suiza)<br>Moderate/severe anxiety: 10.5% (17.5% Brazil, 3.5% Suiza)                       | No       |
| 48. | Quiroga-Garza, et al.2021   | Mexico                 | 4/30/2020 - 6/16/2020  | 604                                      | 18 years or older                                                  | Convenience | DASS-21<br>PERMA Profiler<br>Brief COPE<br>MCCS | Cross-sectional | -           | Moderate-severe psychological distress: 29.5%<br>Extremely severe psychological distress: 16.4%                                                                                                                                                          | Yes      |
| 49. | Ramírez-Coronel, et al.2021 | Ecuador                | -                      | 381                                      | Adult women between 18 and 65 years of age who were in confinement | Convenience | STAI<br>IDER                                    | Cross-sectional | -           | Anxiety: 71.4% (n=272)<br>Depression: 77.2% (n=294)                                                                                                                                                                                                      | -        |



|     | Authors                   | Country | Data collection period | N                                    | Inclusion criteria                                                                                    | Sampling    | Assessment tools                                      | Design          | Time points | Results                                                                                                                                                                                            | Lockdown |
|-----|---------------------------|---------|------------------------|--------------------------------------|-------------------------------------------------------------------------------------------------------|-------------|-------------------------------------------------------|-----------------|-------------|----------------------------------------------------------------------------------------------------------------------------------------------------------------------------------------------------|----------|
| 50. | Ramos-Padilla, et al.2021 | Ecuador | June to July 2020      | 9522                                 | 18 years or older                                                                                     | Convenience | PSQI                                                  | Cross-sectional | -           | Sleep quality (bad quality):<br>Women: 51%<br>Men: 47%<br><br>Sleep duration (<7 hours)<br>Women: 34.9%<br>Men: 36.8%<br><br>Sleep efficiency (<65%)<br>Women: 23.6%,<br>Men: 23.7%                | Yes      |
| 51. | Ribeiro, et al.2021       | Brazil  | 4/27/2020 - 7/5/2020   | Total sample: 981. Final sample: 936 | Adults over 18 years of age who are residents of cities with established social distance restrictions | Snowball    | GAD-7<br>CES-D                                        | Cross-sectional | -           | Severe anxiety: 17.36% (n=162)<br>Severe depression: 66.13% (n= 617)                                                                                                                               | -        |
| 52. | Riter, et al.2021         | Brazil  | 5/27/2020 - 6/15/2020  | 232                                  | Parents over 18 years of age                                                                          | Convenience | SRQ-20<br>PSS-4<br>PSOC                               | Cross-sectional | -           | Stress: 92.2% above the cut-off point.<br>Common mental disorders:46.6% above the cut-off point.                                                                                                   | -        |
| 53. | Ruiz-Frutos, et al.2021   | Peru    | 4/2/2020 - 9/2/2020    | 1699                                 | 18 years or older                                                                                     | Snowball    | GHQ-12                                                | Cross-sectional | -           | Psychological distress: 59.7% (n= 1014)<br>Men: 64.9%<br>Women: 53%<br>40 years old or less: 65.7% ;<br>53.4% in ≥40                                                                               | -        |
| 54. | Schmitt, et al.2021       | Brazil  | 4/14/2020 - 4/23/2020  | 3274                                 | 18 years or older                                                                                     | Snowball    | PHQ-9<br>EUROHIS-QOL<br>MOS<br>WHOQoL-SRPB<br>CD-RISC | Cross-sectional | -           | Depression: 16.13% (n= 528)<br><br>Clarification: the exclusion of the N of healthcare practitioners with depression was calculated (n = 247)<br>Depression % en the total sample: 23.67% (n= 775) | -        |

|     | Authors                   | Country   | Data collection period | N                                      | Inclusion criteria  | Sampling    | Assessment tools             | Design          | Time points | Results                                                                                                                                                                                                                                                                                                         | Lockdown |
|-----|---------------------------|-----------|------------------------|----------------------------------------|---------------------|-------------|------------------------------|-----------------|-------------|-----------------------------------------------------------------------------------------------------------------------------------------------------------------------------------------------------------------------------------------------------------------------------------------------------------------|----------|
| 55. | Scotta, et al.2020        | Argentina | March 2020             | 584                                    | University students | Convenience | ISI<br>PSWQ<br>CRI<br>UWES-S | Cross-sectional | -           | Moderate insomnia: 23%<br>Severe insomnia: 4%                                                                                                                                                                                                                                                                   | Yes      |
| 56. | Seco Ferreira, et al.2020 | Brazil    | 4/3/2020 - 4/16/2020   | 924                                    | -                   | Convenience | DASS-21<br>IUS-12            | Cross-sectional | -           | Anxiety: 48.5%<br>Depression: 41.9%<br>Stress: 44.8%                                                                                                                                                                                                                                                            | Yes      |
| 57. | Serafim, et al.2021       | Brazil    | 5/22/2020 - 6/5/2020   | Total sample: 3031. Final sample: 3000 | 18 years or older   | Snowball    | DASS-21                      | Cross-sectional | -           | Anxiety: 39.7% (n=1191)<br>Mild 18.3% (n= 218)<br>Moderate 41.4% (n= 493)<br>Severe40.3% (n= 480)<br>Depression: 46.4% (n= 1392)<br>Mild 32.5% (n= 453)<br>Moderate 35.1% (n= 489)<br>Severe 32.1% (n= 450)<br>Stress: 42.2% (n= 1266)<br>Mild 31.7% (n= 401)<br>Moderate 33.3% (n= 422)<br>Severe 35% (n= 443) | -        |
| 58. | Silva, et al.2020         | Brazil    | 5/12/2020 - 5/14/2020  | 1154                                   | -                   | -           | DASS-21                      | Cross-sectional | -           | Moderate-extremely severe anxiety: women 46.41% (n= 374); men 28.74% (n= 100)<br>Moderate-extremely severe depression: women 60.43% (n= 487); men 40.81% (n= 142)<br>Moderate-extremely severe stress: women 51.74% (n= 417); men 31.61% (n= 110)                                                               | -        |

|     | Authors                                    | Country | Data collection period                             | N                                      | Inclusion criteria | Sampling    | Assessment tools        | Design          | Time points               | Results                                                                                                                                                                                                                                                                                                                                                                    | Lockdown |
|-----|--------------------------------------------|---------|----------------------------------------------------|----------------------------------------|--------------------|-------------|-------------------------|-----------------|---------------------------|----------------------------------------------------------------------------------------------------------------------------------------------------------------------------------------------------------------------------------------------------------------------------------------------------------------------------------------------------------------------------|----------|
| 59. | Soares, et al.2021                         | Brazil  | 8/1/2020 - 9/1/2020                                | 206                                    | Athletes           | Convenience | STAI<br>BRUMS           | Cross-sectional | -                         | Trait anxiety<br>Moderate: 72.12% (n= 154)<br>Elevated: 24.87% (n= 51)<br>State anxiety<br>Moderate: 71.21% (n= 146)<br>Elevated: 28.78% (n= 59)<br>Sleep Quality<br>Too bad: 5.78% (n=7)<br>Bad: 15.7% (n=27)                                                                                                                                                             | -        |
| 60. | Souza, et al.2021                          | Brazil  | April to May 2020                                  | Total sample: 3793. Final sample: 3200 | 18 years or older  | Snowball    | DASS-21                 | Cross-sectional | -                         | Anxiety: 19.4%<br>Mild: 7.9% (n= 252)<br>Moderate: 17.3% (n= 552)<br>Severe: 6.3% (n=203)<br>Extreme: 13.1% (n= 419)<br>Depression: 21.5%<br>Mild: 12.9% (n= 414)<br>Moderate: 18.8% (n= 602)<br>Severe: 6.3% (n= 203)<br>Extreme: 13.1% (n= 419)<br>Stress: 21.5%<br>Mild: 12.9% (n= 414)<br>Moderate: 13.1% (n= 419)<br>Severe: 12.9% (n= 413)<br>Extreme: 8.6% (n= 275) | -        |
| 61. | Stults-Kolehmainen, et al.2021 (Pre-print) | Brazil  | T1: 3/20/2020 - 3/25/2020<br>T2: 15/4/20 - 20/4/20 | 360                                    | -                  | Convenience | PSS-10<br>FDI<br>STAI-S | Longitudinal    | T1 and T2 during COVID-19 | Perceived stress: 237 (65.8%) and 269 (74.7%) of participants scored above the population mean at time 1 and 2, respectively.<br>Excessive stress: 6.9% (IC 95 5.2%-8.6%) in the first round                                                                                                                                                                               | Yes      |

|     | Authors                 | Country | Data collection period   | N    | Inclusion criteria                                         | Sampling    | Assessment tools       | Design          | Time points | Results                                                                                                                                                                                                                                                      | Lockdown |
|-----|-------------------------|---------|--------------------------|------|------------------------------------------------------------|-------------|------------------------|-----------------|-------------|--------------------------------------------------------------------------------------------------------------------------------------------------------------------------------------------------------------------------------------------------------------|----------|
|     |                         |         |                          |      |                                                            |             |                        |                 |             | and 9.7% (IC 95 8.2%-11.2%) in the second round. High depression: 4.2% (IC 95 3.6%-4.8%) at time 1 and 8.0% (IC 95 7.1%-8.9%) at time 2. Excessive state anxiety: 8.7% (IC 95 7.4%-10.0%) in the first round, 14.9% (IC 95 12.3%-17.5%) in the second round. |          |
| 62. | Suárez-Rico, et al.2021 | Mexico  | August to September 2020 | 293  | New mothers over 18 years of age 4 to 12 weeks postpartum. | Convenience | EPDS<br>STAI<br>PSS-10 | Cross-sectional | -           | State anxiety: 46.1% (n=135)<br>Depression: 39.2% (n=115)<br>Low stress: 31.1% (n=91)<br>Moderate stress: 58% (n=170)<br>Elevated stress: 10.9% (n=32)                                                                                                       | Yes      |
| 63. | Terán-Pérez, et al.2021 | Mexico  | 3/28/2020 - 5/26/2020    | 1230 | 18 years or older                                          | Convenience | PSQI<br>GAD-7<br>PHQ-9 | Cross-sectional | -           | Mild anxiety: women 34.8%; men 38.1%<br>Moderate anxiety: women 18.3%; men 16.9%<br>Severe anxiety: women 18%; men 19%.<br>Moderate and severe depression: women 24.5%; men 18.6%<br>Poor sleep quality: women 79%; men 60%                                  | Yes      |

|     | Authors                      | Country   | Data collection period                                      | N                                    | Inclusion criteria | Sampling    | Assessment tools        | Design          | Time points                         | Results                                                                                                                                                                                                                                                                                                                                        | Lockdown |
|-----|------------------------------|-----------|-------------------------------------------------------------|--------------------------------------|--------------------|-------------|-------------------------|-----------------|-------------------------------------|------------------------------------------------------------------------------------------------------------------------------------------------------------------------------------------------------------------------------------------------------------------------------------------------------------------------------------------------|----------|
| 64. | Toledo-Fernández, et al.2021 | Mexico    | T1: 4/8/2020<br>- 4/18/2020<br>T2: 5/11/2020<br>- 5/27/2020 | Total sample: 670. Final sample: 552 | -                  | Convenience | IES-6<br>PHQ-9<br>GAD-7 | Longitudinal    | T1 and T2 during COVID-19 pandemic. | Moderate-severe anxiety<br>T1: 11.94%<br>T2: 12.23%<br><br>Moderate-severe depression<br>T1: 5.22%<br>T2: 6.26%<br><br>Psychological distress<br>T1: 27.61%<br>T2: 21.94%                                                                                                                                                                      | -        |
| 65. | Torales, et al.2020          | Paraguay  | 10/10/2020 - 4/15/2020                                      | 2206                                 | 18 years or older  | Convenience | PSS-10                  | Cross-sectional | -                                   | (Stress%)<br><i>Total sample:</i><br>-Moderate stress: 67,95% (n= 1499)<br>High stress: 9.84% (n= 217)<br><i>Participants without mental disorder</i><br>- Moderate stress 67.49% (n= 1304)<br>- High stress 8.02% (n= 155)<br><i>Participants with mental disorder</i><br>- Moderate stress: 71.17% (n= 195)<br>- High stress: 22.63% (n= 62) | Yes      |
| 66. | Torrente, et al.2021         | Argentina | 3/24/2020                                                   | 10053                                | 18 years or older  | Convenience | PHQ-9<br>GAD-7          | Cross-sectional | -                                   | Anxiety: 23.2%<br>Mild: 31.6%<br>Moderate: 13.6%<br>Severe: 8.1%<br><br>Depression: 33.7%<br>Mild: 18.5%<br>Moderate: 18.1%<br>Severe: 10.5%                                                                                                                                                                                                   | Yes      |

|     | Authors                           | Country                                         | Data collection period                       | N                                                           | Inclusion criteria                                             | Sampling           | Assessment tools              | Design          | Time points | Results                                                                                                                                                                                                                 | Lockdown |
|-----|-----------------------------------|-------------------------------------------------|----------------------------------------------|-------------------------------------------------------------|----------------------------------------------------------------|--------------------|-------------------------------|-----------------|-------------|-------------------------------------------------------------------------------------------------------------------------------------------------------------------------------------------------------------------------|----------|
| 67. | Torrente, et al. 2021             | Argentina                                       | 5/21/2020 and enabled for 15 days (6/5/2020) | 3617                                                        | 18 years or older                                              | Convenience sample | PHQ-9<br>GAD-7<br>UCLA-LS     | Cross-sectional | -           | Depression<br>45.6%<br>Mild 24.5%<br>Moderate 22.3%<br>Severe 15.4%<br><br>Anxiety<br>27%<br>Mild 26.3%<br>Moderate 16.5%<br>Severe 10.5%<br><br>Loneliness<br>Low 66.3%<br>Medium 17.1%<br>High 10.4%<br>Extreme: 6.2% | Yes      |
| 68. | Tyler, et al.2021                 | 15 countries of Latin America and the Caribbean | 4/19/2020 - 5/3/2020                         | Total sample: 823. Latin American and Caribbean sample: 366 | 60 years or older                                              | Snowball           | DASS-21<br>GAD-7<br>EPII      | Cross-sectional | -           | Depressive symptoms: 10.35%<br>Anxiety symptoms: 5.98%                                                                                                                                                                  | -        |
| 69. | Vitorino, et al. 2021 (Pre-print) | Brazil                                          | 1/5/2020 - 3/6/2020                          | Total sample: 1167. Final sample: 1156                      | Adults over 18 years of age with at least 15 days in isolation | Convenience        | PHQ-9<br>GAD-7<br>WHOQOL-BREF | Cross-sectional | -           | Depression: 41.9%<br>Anxiety: 29%                                                                                                                                                                                       | Yes      |
| 70. | Vizioli & Crespi2021              | Argentina                                       | 3/20/2020 - 4/20/2020                        | 430                                                         | 18 years or older                                              | Convenience        | SA-45                         | Cross-sectional | -           | Anxiety symptoms: 15%<br>Depressive symptoms: 14%                                                                                                                                                                       | Yes      |
| 71. | Zhang, et al.2021                 | Brazil                                          | 3/25/2020 - 3/28/2020                        | 638                                                         | 18 years or older                                              | Convenience        | CPDI                          | Cross-sectional | -           | Mild-moderate distress: 52% (n= 332)<br>Severe distress: 18.8% (n= 120)                                                                                                                                                 | Yes      |

## Tables S2 – S4. Regression analyses

*Table S2. Regression coefficients for predicting depression symptoms*

| Variable                             | B     | SE   | $\beta$ | t     | p    |
|--------------------------------------|-------|------|---------|-------|------|
| Cases (1/millon)                     | -1.16 | .95  | -.67    | -1.23 | .227 |
| Deaths (1/millon)                    | 6.76  | 9.99 | .33     | .68   | .502 |
| Lockdown stringency index            | .15   | .29  | .08     | .50   | .617 |
| Days since beginning of the pandemic | .14   | .09  | .34     | 1.60  | .117 |

Note.  $R^2_{adj} = -.005$  (N = 44, p = .447)

*Table S3. Regression coefficients for predicting anxiety symptoms*

| Variable                             | B      | SE    | $\beta$ | t     | p    |
|--------------------------------------|--------|-------|---------|-------|------|
| Cases (1/millon)                     | 4.33   | 3.04  | 2.06    | 1.43  | .164 |
| Deaths (1/millon)                    | -61.85 | 38.58 | -2.22   | -1.60 | .119 |
| Lockdown stringency index            | -.49   | .41   | -.21    | -1.18 | .246 |
| Days since beginning of the pandemic | .03    | .09   | .08     | .32   | .750 |

Note.  $R^2_{adj} = .118$  (N = 36, p = .095)

*Table S4. Regression coefficients for predicting stress symptoms*

| Variable                             | B       | SE     | $\beta$ | t    | p    |
|--------------------------------------|---------|--------|---------|------|------|
| Cases (1/millon)                     | .49     | 11.52  | .03     | .04  | .967 |
| Deaths (1/millon)                    | -111.92 | 452.25 | -.30    | -.25 | .809 |
| Lockdown stringency index            | .67     | 1.88   | .11     | .36  | .728 |
| Days since beginning of the pandemic | .32     | .56    | .52     | .58  | .574 |

Note.  $R^2_{adj} = -.226$  (N = 17, p = .896)

**Figure S1. Prevalence of depressive symptoms in cross-sectional studies**

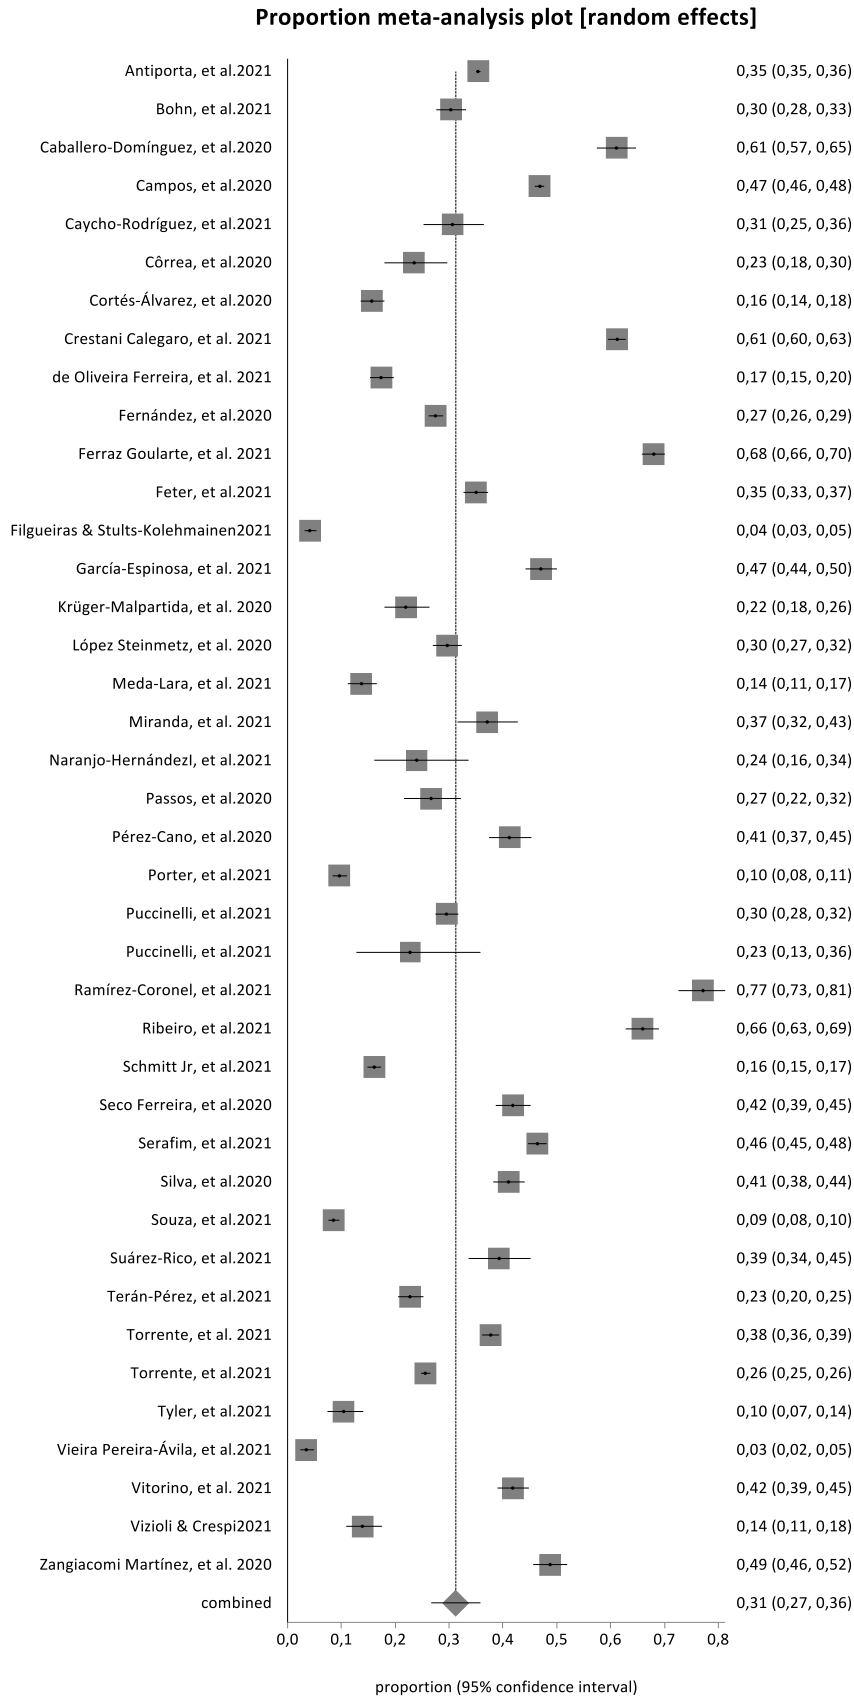



**Figure S2. Prevalence of depressive symptoms by country**

**a. Brazil**

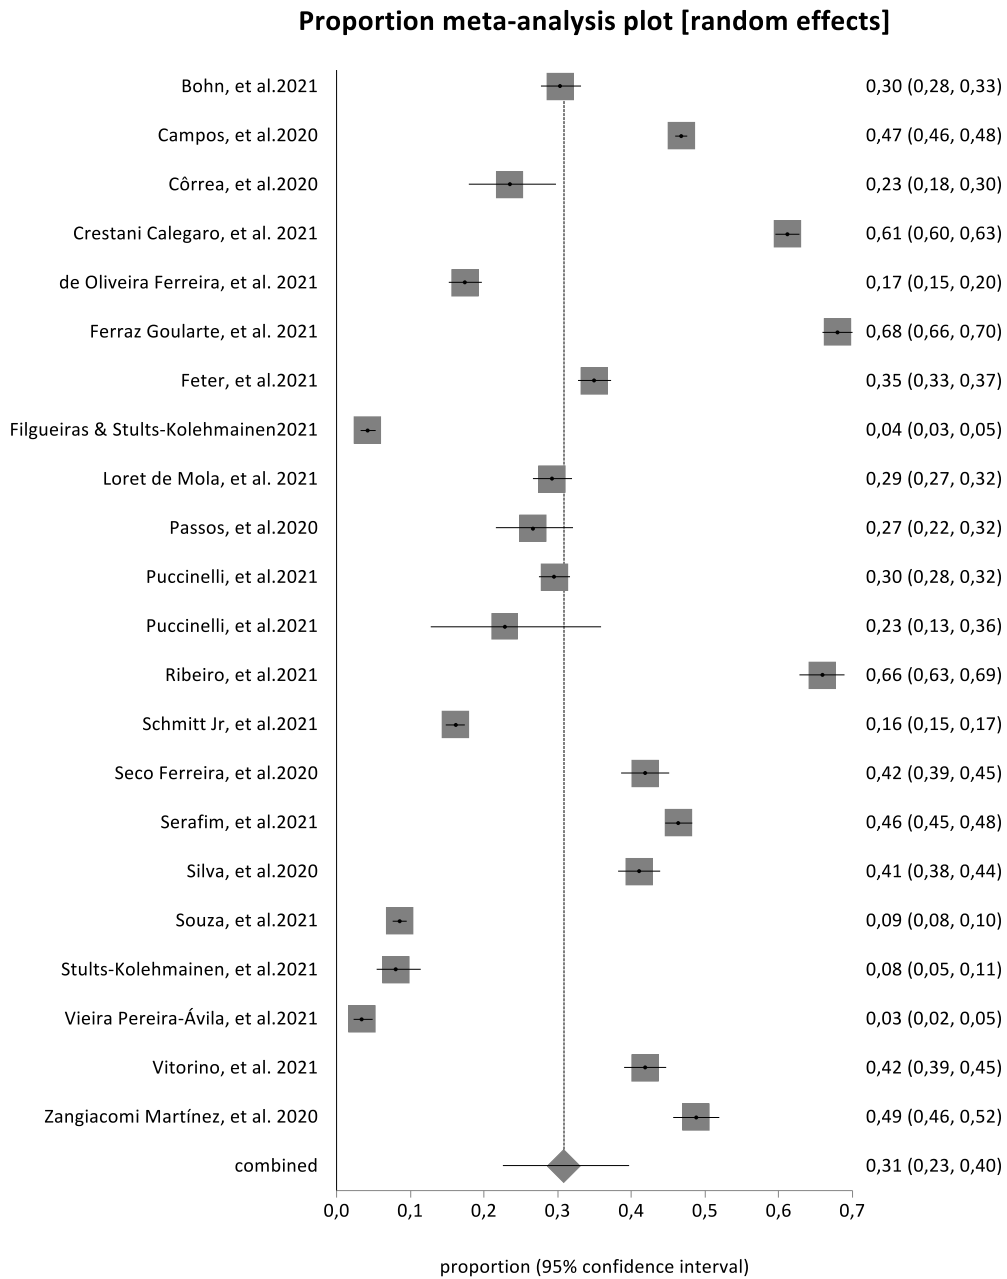

## b. Argentina

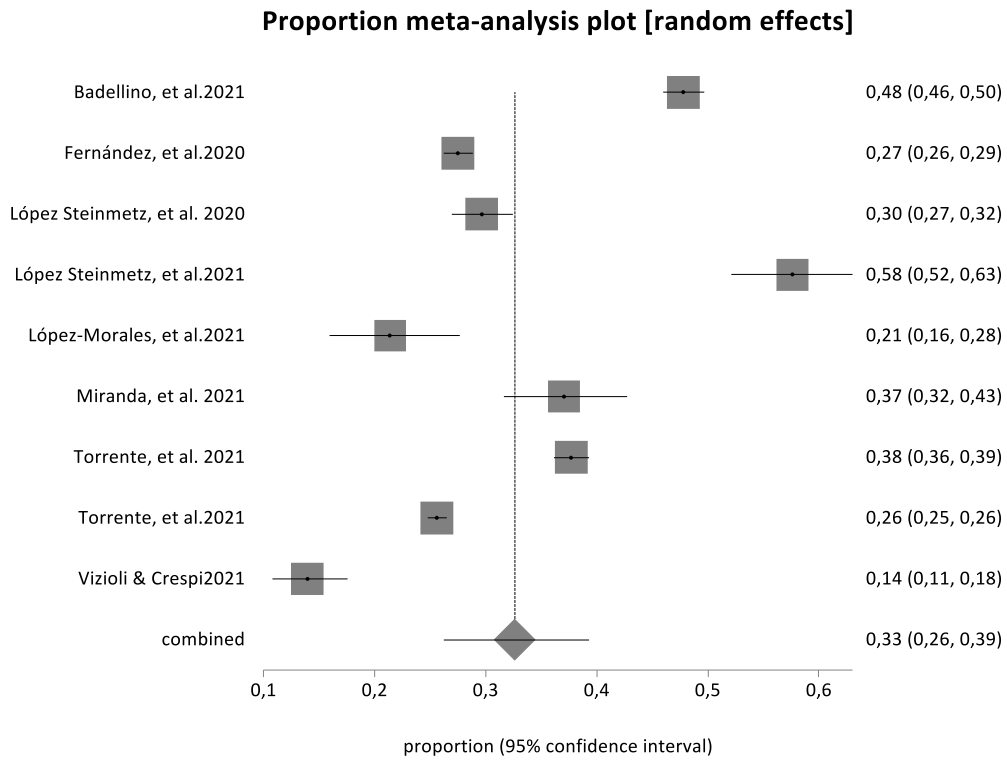

## c. Mexico

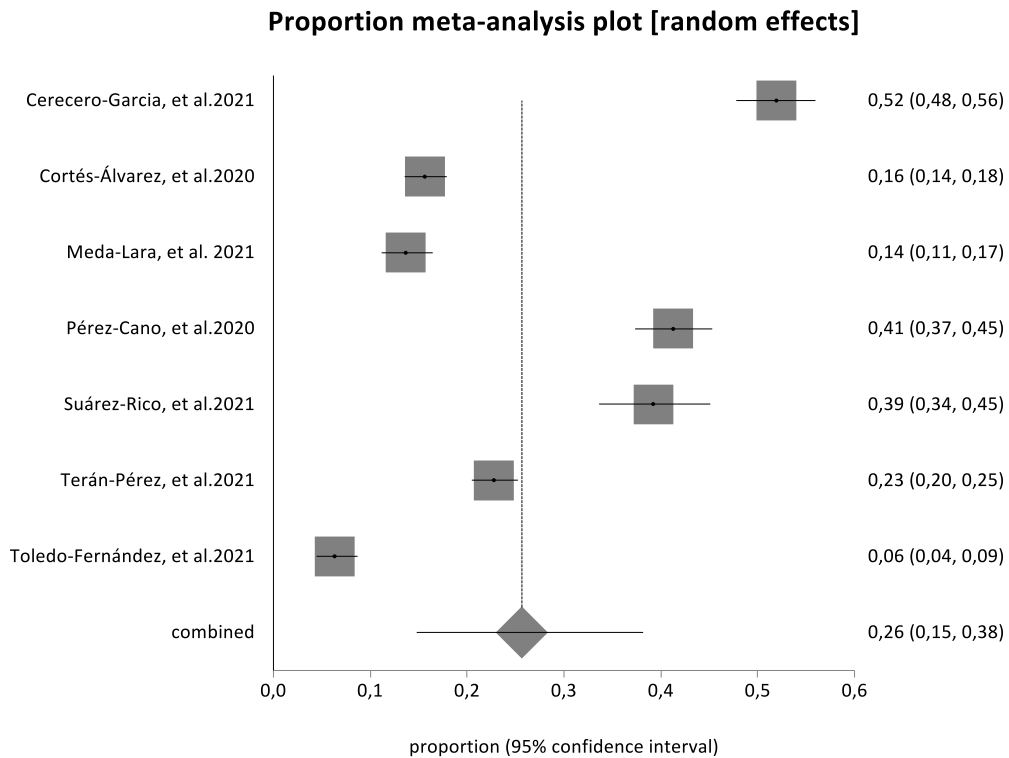

## d. Peru

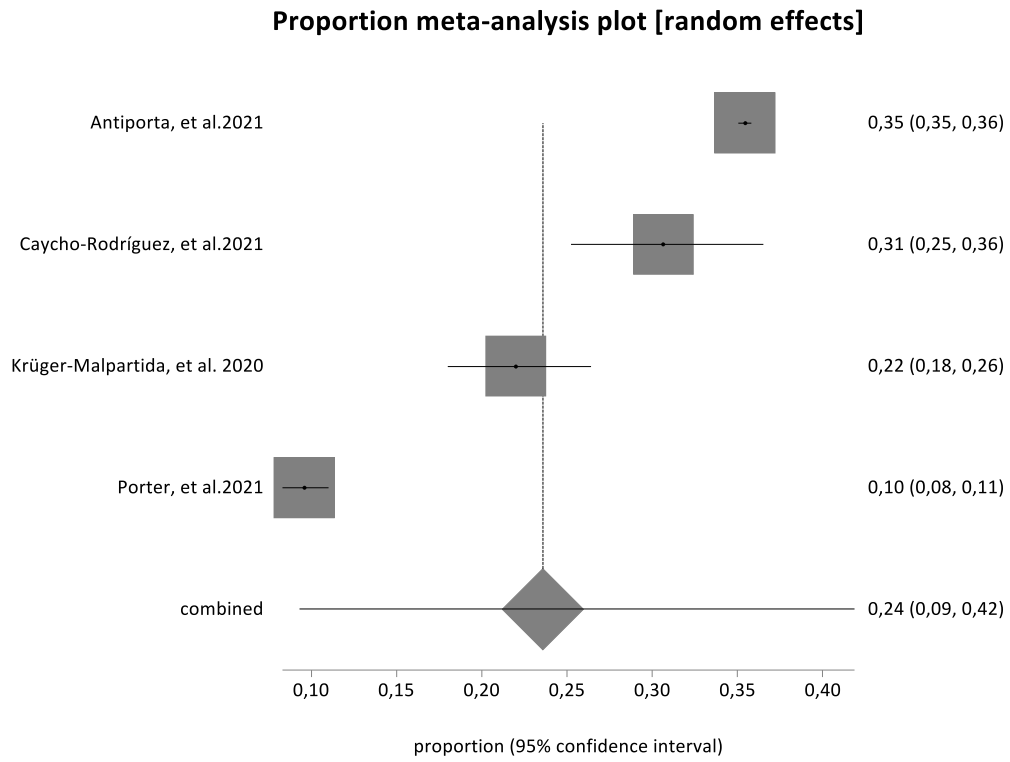

**Figure S3. Prevalence of anxiety symptoms in cross-sectional studies**

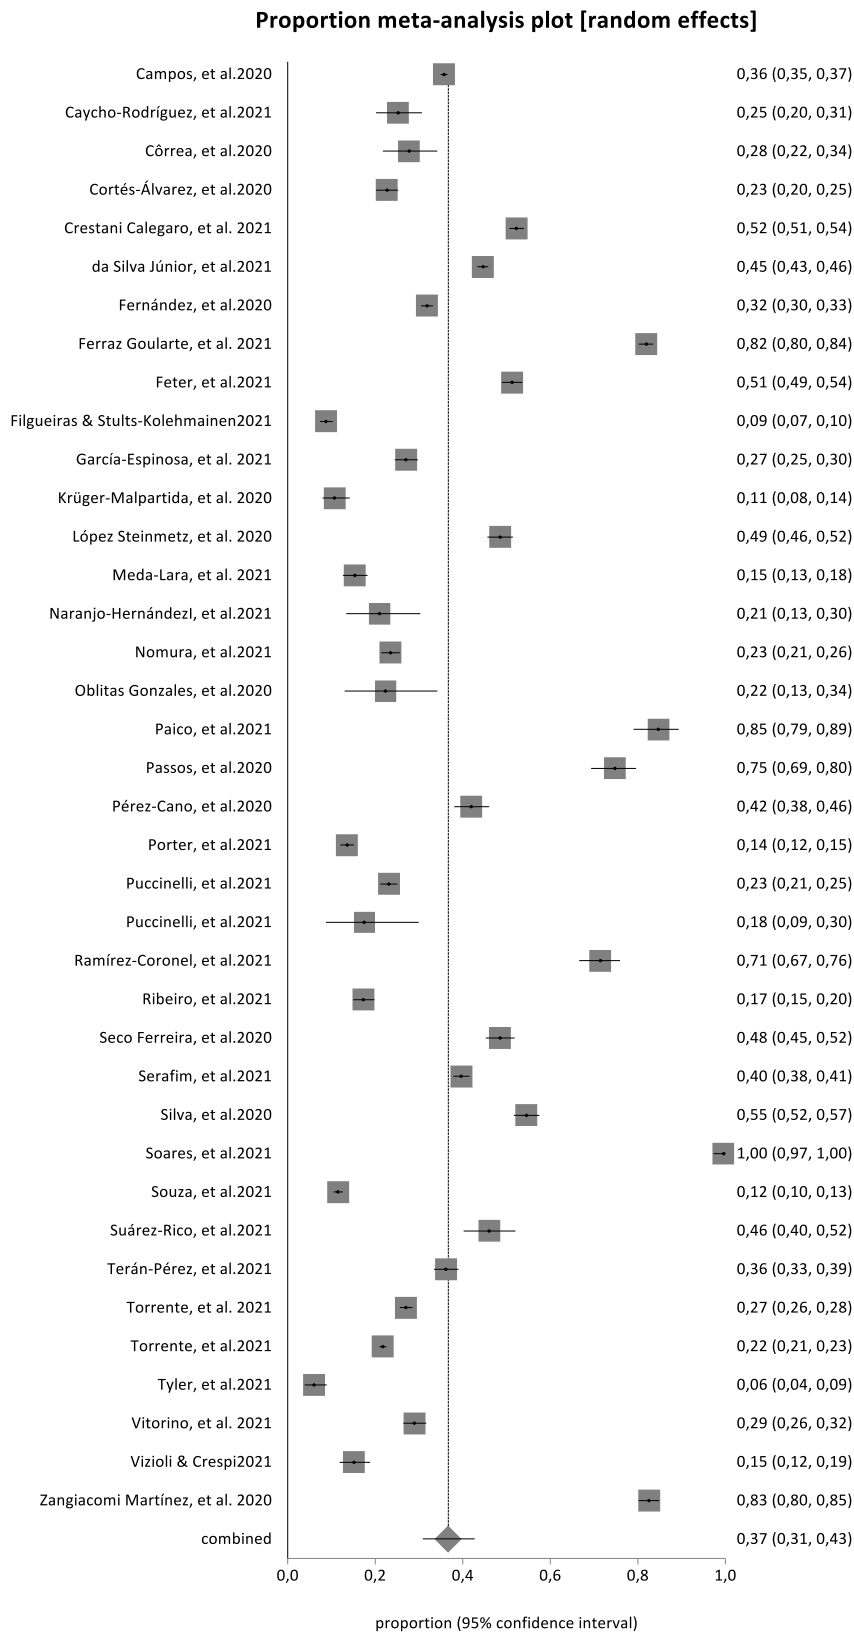

**Figure S4. Prevalence of anxiety symptoms by country**

**a. Brazil**

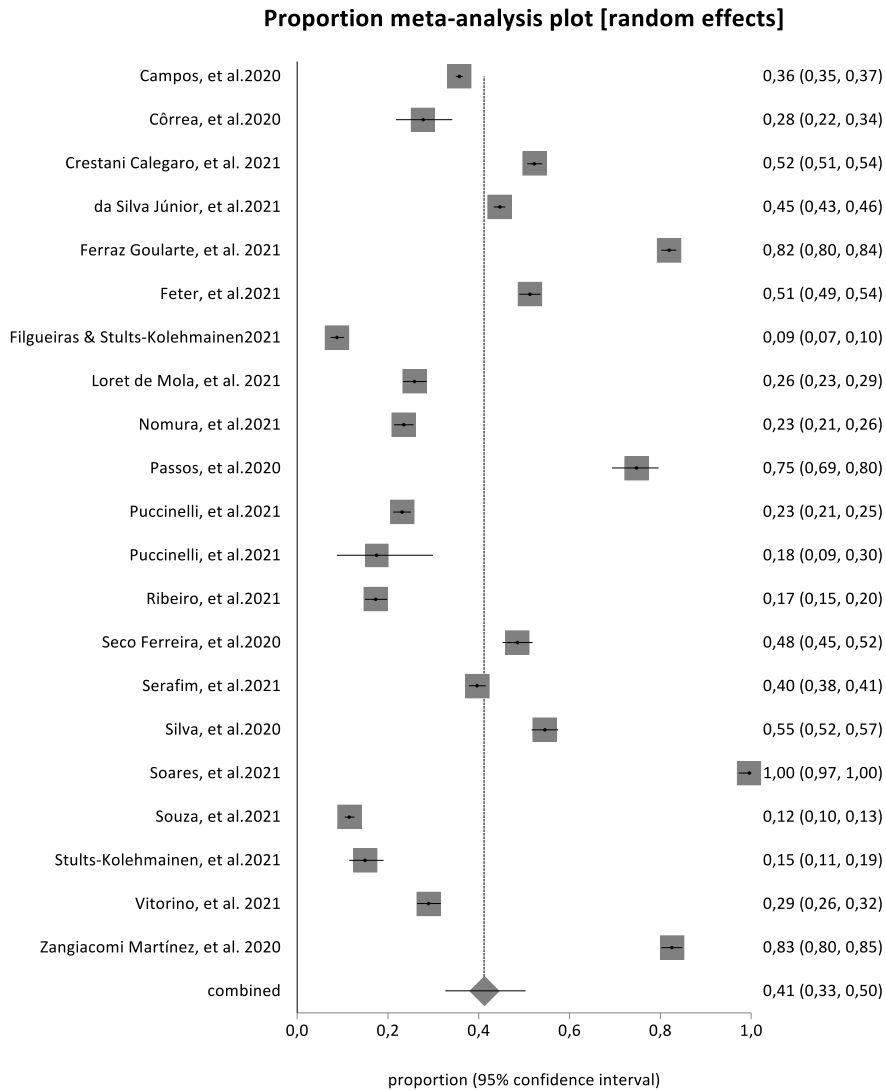

## b. Argentina

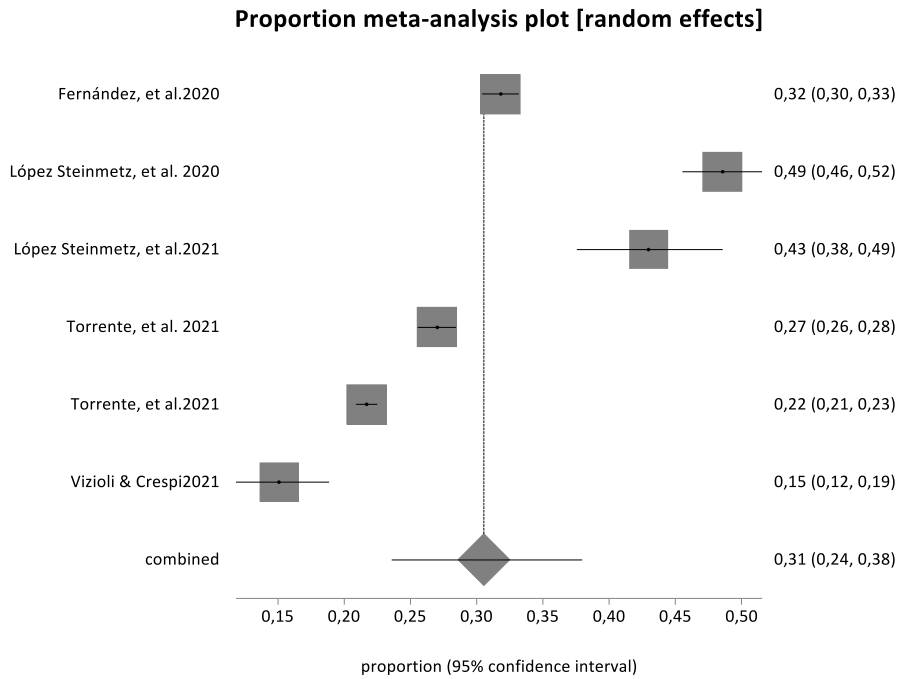

## c. Mexico

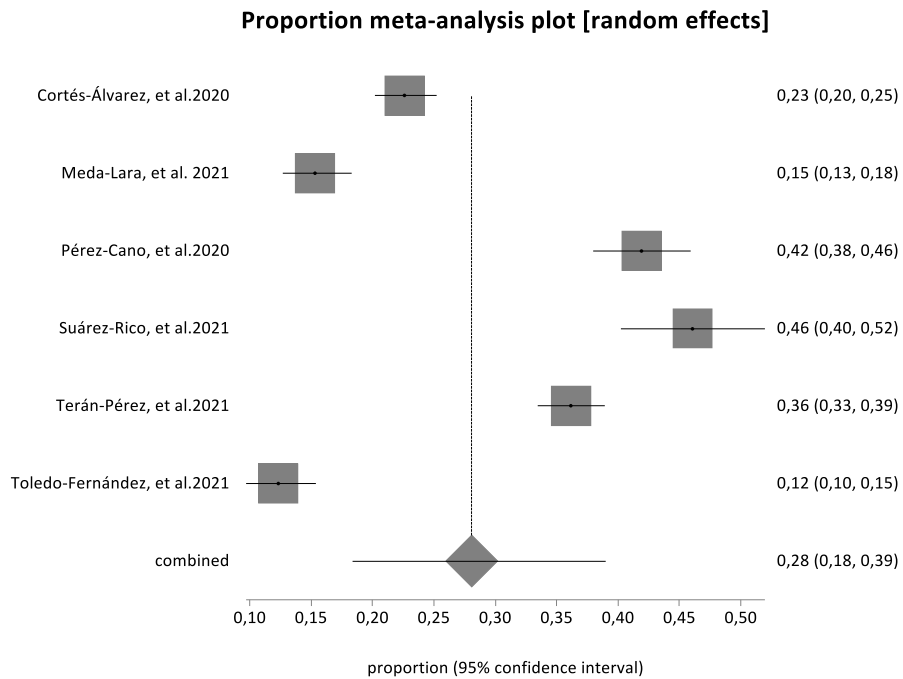

## d. Peru

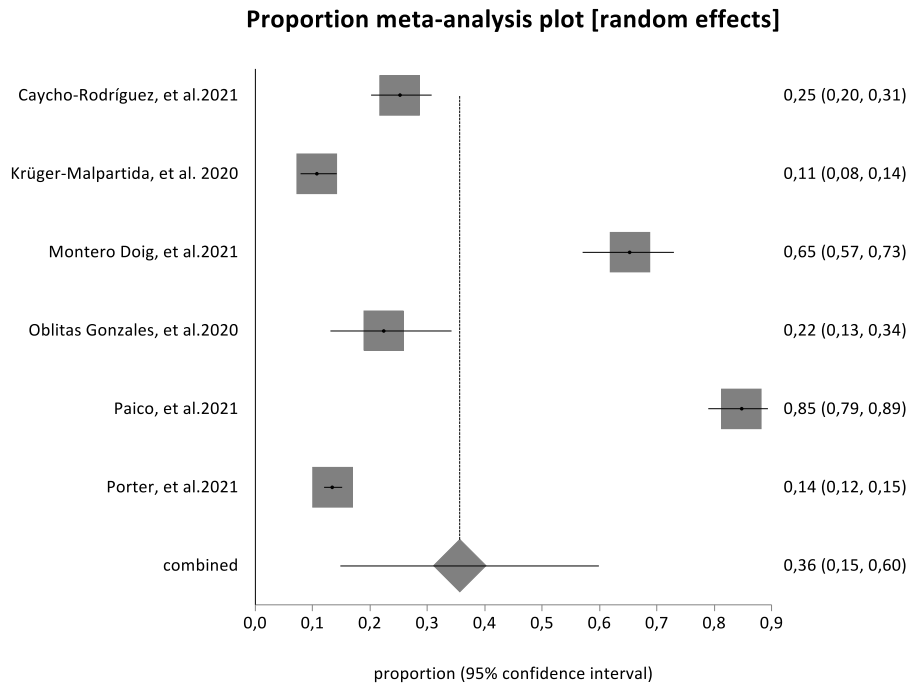

**Figure S5: Prevalence of stress symptoms**

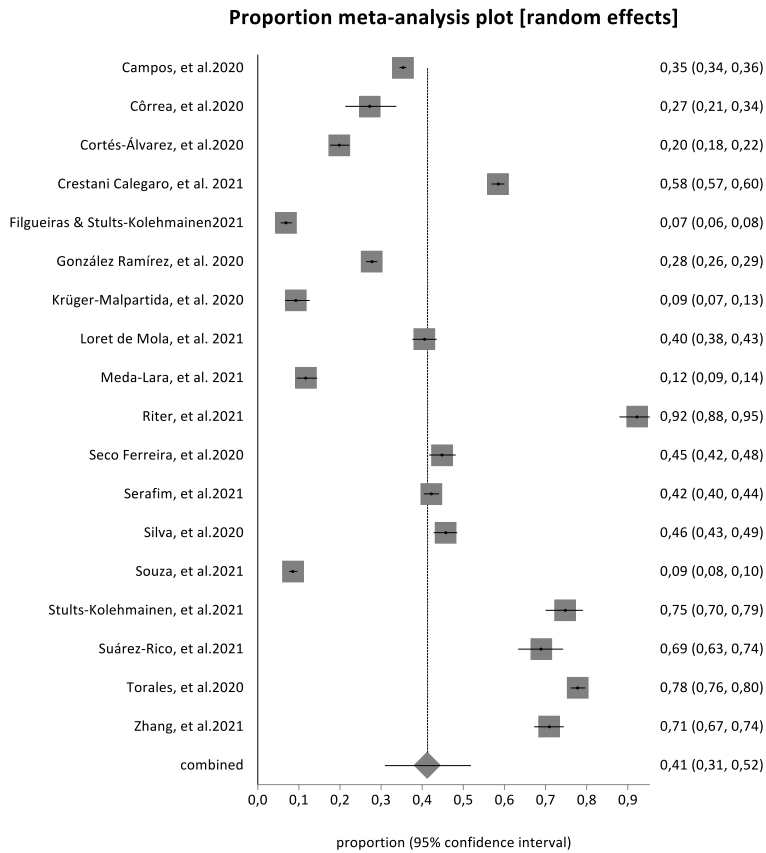

**Figure S6. Prevalence of distress symptoms**

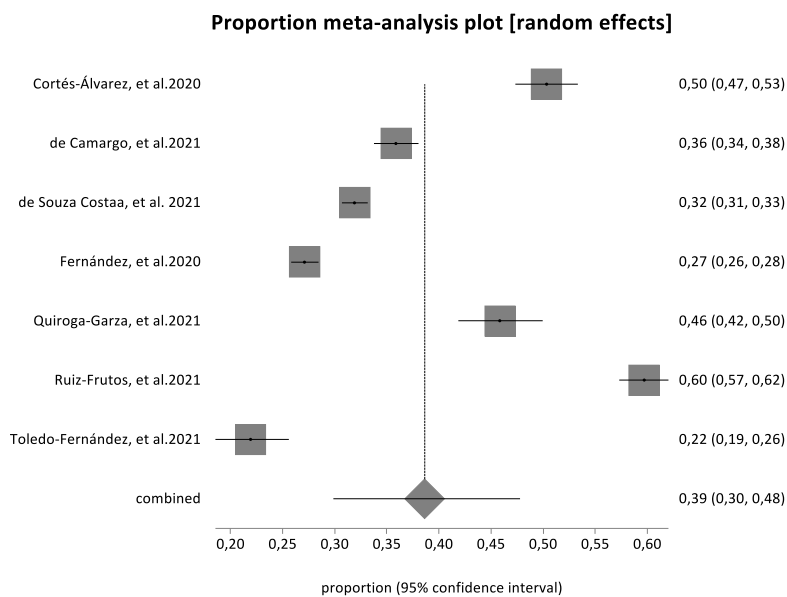



**Figure S7. Prevalence of sleep quality problems**

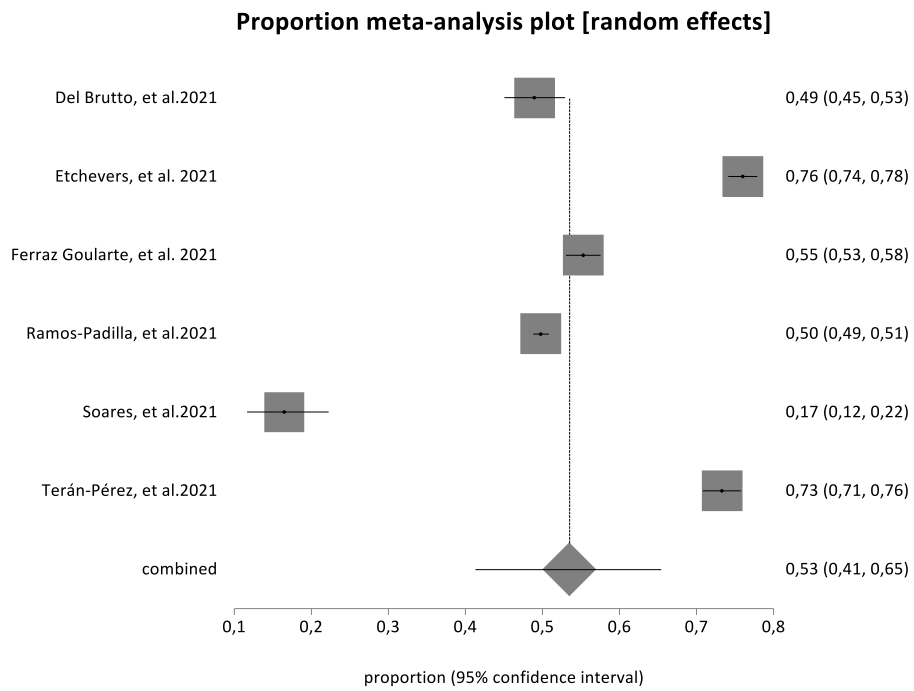

**Figure S8. Prevalence of loneliness**

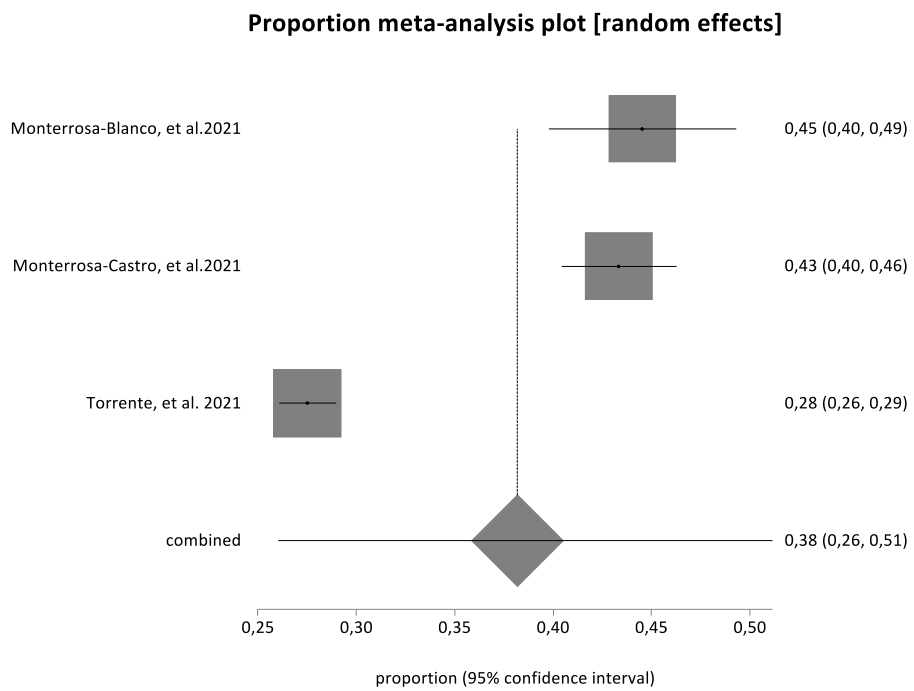

## References of included studies

1. Antiporta, D. A., Cutipé, Y. L., Mendoza, M., Celentano, D. D., Stuart, E. A., & Bruni, A. (2021). Depressive symptoms among Peruvian adult residents amidst a National Lockdown during the COVID-19 pandemic. *BMC Psychiatry*, *21*(1). <https://doi.org/10.1186/s12888-021-03107-3>
2. Badellino, H., Gobbo, M. E., Torres, E., & Aschieri, M. E. (2021). Early indicators and risk factors associated with mental health problems during COVID-19 quarantine: Is there a relationship with the number of confirmed cases and deaths? *International Journal of Social Psychiatry*, *67*(5), 567-575. <https://doi.org/10.1177/0020764020966020>
3. Badellino, H., Gobbo, M. E., Torres, E., Aschieri, M. E., Biotti, M., Alvarez, V., Gigante, C., & Cachiarelli, M. (2021). «It's the economy, stupid»: Lessons of a longitudinal study of depression in Argentina. *The International journal of social psychiatry*, 20764021999687. <https://doi.org/10.1177/0020764021999687>
4. Bohn, L., Gomes, S., Neto, E. S. D. Q., Lage, A. C. S. D. S., de Freitas, M. D. D. B., Magalhães, F. D. P., Mota, J., & Soares Miranda, L. (2021). Predictors of Lower Depression Levels in Older Adults During COVID-19 Lockdown. *Journal of Applied Gerontology*. <https://doi.org/10.1177/07334648211025116>
5. Caballero-Domínguez, C. C., Jiménez-Villamizar, M. P., & Campo-Arias, A. (2020). Suicide risk during the lockdown due to coronavirus disease (COVID-19) in Colombia. *Death studies*, 1-6. <https://doi.org/10.1080/07481187.2020.1784312>
6. Calegario, V. C., Ramos-Lima, L. F., Hoffmann, M. S., Zoratto, G., Kerber, N., Dala Costa, F. C., Picinin, V. D., Köchler, J., Rodrigues, L., Maciel, L., Braun, L. E., Girardi, F. L., Cecatto, G. O., Weber, L. P., Rodrigues, B. F., Bertolazi, A.

- N., de Oliveira, J. M., Negretto, B. L., & de Mello, A. F. (2021). Closed Doors: Predictors of Stress, Anxiety, Depression, and PTSD During the Onset of COVID-19 Pandemic in Brazil. *medRxiv*, 2021.08.18.21262061.  
<https://doi.org/10.1101/2021.08.18.21262061>
7. Campos, J. A. D. B., Martins, B. G., Campos, L. A., Marôco, J., Saadiq, R. A., & Ruano, R. (2020). Early psychological impact of the COVID-19 pandemic in Brazil: A national survey. *Journal of Clinical Medicine*, 9(9), 1-14.  
<https://doi.org/10.3390/jcm9092976>
  8. Caycho-Rodríguez, T., Tomás, J. M., Vilca, L. W., García, C. H., Rojas-Jara, C., White, M., & Peña-Calero, B. N. (2021). Predictors of mental health during the COVID-19 pandemic in older adults: The role of socio-demographic variables and COVID-19 anxiety. *Psychology, health & medicine*, 1-13.  
<https://doi.org/10.1080/13548506.2021.1944655>
  9. Cerecero-Garcia, D., Vermandere, H., Bojorquez, I., Gómez-Castro, J., Arturo Sánchez-Ochoa, J., Martínez-Dávalos, A., Huerta-Icelo, I., & Bautista-Arredondo, S. (2021). Profiles of Depressive Symptoms Among Men Who Have Sex With Men and Transgender Women During the COVID-19 Outbreak in Mexico: A Latent Class Analysis. *Frontiers in public health*, 9, 598921.  
<https://doi.org/10.3389/fpubh.2021.598921>
  10. Cheung, T., Lam, S. C., Lee, P. H., Xiang, Y. T., & Yip, P. S. F. (2020). Global Imperative of Suicidal Ideation in 10 Countries Amid the COVID-19 Pandemic. *Frontiers in Psychiatry*, 11. <https://doi.org/10.3389/fpsy.2020.588781>
  11. Côrrea, C. A., Verlengia, R., Ribeiro, A. G. S. V., & Crisp, A. H. (2020). Níveis de estresse, ansiedade, depressão e fatores associados durante a pandemia de COVID-19 em praticantes de Yoga<sup>^</sup>iptLevels of stress, anxiety, depression and

- associated factors during the COVID-19 pandemic in Yoga practitioners<sup>^</sup>ien.  
*Rev. bras. ativ. fís. saúde*, 25, 1-7.
12. Cortés-Álvarez, N. Y., Piñeiro-Lamas, R., & Vuelas-Olmos, C. R. (2020). Psychological Effects and Associated Factors of COVID-19 in a Mexican Sample. *Disaster medicine and public health preparedness*, 14(3), 413-424.  
<https://doi.org/10.1017/dmp.2020.215>
13. da Silva Júnior, A. E., de Lima Macena, M., de Oliveira, A. D. S., Praxedes, D. R. S., de Oliveira Maranhão Pureza, I. R., & Bueno, N. B. (2021). Racial Differences in Generalized Anxiety Disorder During the COVID-19 Pandemic among Brazilian University Students: A National Survey. *Journal of racial and ethnic health disparities*. <https://doi.org/10.1007/s40615-021-01107-3>
14. De Boni, R. B., Ribeiro-Alves, M., Mota, J. C., Gomes, M., Balanzá-Martínez, V., Kapczinski, F., & Bastos, F. I. (2021). The cumulative effect of multiple dimensions of lifestyle on risky drinking during the Covid-19 pandemic. *Preventive Medicine*, 150. <https://doi.org/10.1016/j.ypmed.2021.106718>
15. de Camargo, E. M., Piola, T. S., Dos Santos, L. P., de Borba, E. F., de Campos, W., & da Silva, S. G. (2021). Frequency of physical activity and stress levels among brazilian adults during social distancing due to the coronavirus (Covid-19): Cross-sectional study. *Sao Paulo Medical Journal*, 139(4), 325-330.  
<https://doi.org/10.1590/1516-3180.2020.0706.R1.0802021>
16. de Souza Costa, D., Paula, J. J. de, Serpa, A. L. d. O., Diaz, A. P., Rocha, M. C. M. da, & Pinto, A. L. B. (2021). Predictors of Psychological Distress and Prevalence of Self-reported Mental Disorders Across Healthcare Professionals and the General Population During the COVID-19 Outbreak in Brazil. *PsyArXiv*. <https://doi.org/10.31234/osf.io/szhnx>

17. Del Brutto, O. H., Mera, R. M., Costa, A. F., Recalde, B. Y., & Castillo, P. R. (2021). Sleep quality deterioration in middle-aged and older adults living in a rural Ecuadorian village severely struck by the SARS-CoV-2 pandemic. A population-based longitudinal prospective study. *Sleep*.  
<https://doi.org/10.1093/sleep/zsab041>
18. Etchevers, M. J., Garay, C. J., Putrino, N. I., Helmich, N., & Lunansky, G. (2021). Argentinian Mental Health During the COVID-19 Pandemic: A Screening Study of the General Population During Two Periods of Quarantine. *Clinical Psychology in Europe*, 3(1), 1-17. <https://doi.org/10.32872/cpe.4519>
19. Fernández, R. S., Crivelli, L., Guimet, N. M., Allegri, R. F., & Pedreira, M. E. (2020). Psychological distress associated with COVID-19 quarantine: Latent profile analysis, outcome prediction and mediation analysis. *Journal of Affective Disorders*, 277, 75-84. <https://doi.org/10.1016/j.jad.2020.07.133>
20. Ferreira, F. O., Lopes-Silva, J. B., Siquara, G. M., Manfroí, E. C., & de Freitas, P. M. (2021). Coping in the Covid-19 pandemia: How different resources and strategies can be risk or protective factors to mental health in the Brazilian population. *Health Psychol Behav Med*, 9(1), 182-205.  
<https://doi.org/10.1080/21642850.2021.1897595>
21. Feter, N., Caputo, E. L., Doring, I. R., Leite, J. S., Cassuriaga, J., Reichert, F. F., da Silva, M. C., Coombes, J. S., & Rombaldi, A. J. (2021). Sharp increase in depression and anxiety among Brazilian adults during the COVID-19 pandemic: Findings from the PAMPA cohort. *Public Health (Elsevier)*, 190, 101-107.  
<https://doi.org/10.1016/j.puhe.2020.11.013>
22. Filgueiras, A., & Stults-Kolehmainen, M. (2021). Risk Factors for Potential Mental Illness Among Brazilians in Quarantine Due To COVID-19.

*Psychological reports*, 33294120976628.

<https://doi.org/10.1177/0033294120976628>

23. García-Espinosa, P., Ortiz-Jiménez, X., Botello-Hernández, E., Aguayo-Samaniego, R., Leija-Herrera, J., & Góngora-Rivera, F. (2021). Psychosocial impact on health-related and non-health related university students during the COVID-19 pandemic. Results of an electronic survey. *Rev Colomb Psiquiatr.* <https://doi.org/10.1016/j.rcp.2021.04.008>
24. González Ramírez, L. P., Martínez Arriaga, R. J., Hernández-Gonzalez, M. A., & De la Roca-Chiapas, J. M. (2020). Psychological Distress and Signs of Post-Traumatic Stress in Response to the COVID-19 Health Emergency in a Mexican Sample. *Psychol Res Behav Manag*, 13, 589-597. <https://doi.org/10.2147/prbm.S259563>
25. Goularte, J. F., Serafim, S. D., Colombo, R., Hogg, B., Caldieraro, M. A., & Rosa, A. R. (2021). COVID-19 and mental health in Brazil: Psychiatric symptoms in the general population. *Journal of Psychiatric Research*, 132, 32-37. <https://doi.org/10.1016/j.jpsychires.2020.09.021>
26. Guzmán-Muñoz, E., Concha-Cisternas, Y., Oñate-Barahona, A., Lira-Cea, C., Cigarroa-Cuevas, I., Méndez-Rebolledo, G., Castillo-Retamal, M., Valdés-Badilla, P., & Zapata-Lamana, R. (2020). [Factors associated with low quality of life in Chilean adults during the COVID-19 quarantine]. *Rev Med Chil*, 148(12), 1759-1766. <https://doi.org/10.4067/s0034-98872020001201759>
27. Krüger-Malpartida, H., Pedraz-Petrozzi, B., Arevalo-Flores, M., Samalvides-Cuba, F., Anculle-Arauco, V., & Dancuart-Mendoza, M. (2020). Effects on Mental Health After the COVID-19 Lockdown Period: Results From a

- Population Survey Study in Lima, Peru. *Clinical Medicine Insights: Psychiatry*, 1-9. <https://doi.org/10.1177/1179557320980423>
28. López Steinmetz, L. C., Dutto Florio, M. A., Leyes, C. A., Fong, S. B., Rigalli, A., & Godoy, J. C. (2020). Levels and predictors of depression, anxiety, and suicidal risk during COVID-19 pandemic in Argentina: The impacts of quarantine extensions on mental health state. *Psychology, health & medicine*, 1-17. <https://doi.org/10.1080/13548506.2020.1867318>
29. López Steinmetz, L. C., Godoy, J. C., & Fong, S. B. (2021). A longitudinal study on depression and anxiety in college students during the first 106-days of the lengthy Argentinean quarantine for the COVID-19 pandemic. *Journal of Mental Health*. <https://doi.org/10.1080/09638237.2021.1952952>
30. López-Morales, H., del Valle, M. V., Canet-Juric, L., Andrés, M. L., Galli, J. I., Poó, F., & Urquijo, S. (2021). Mental health of pregnant women during the COVID-19 pandemic: A longitudinal study. *Psychiatry Research*, 295. <https://doi.org/10.1016/j.psychres.2020.113567>
31. Loret de Mola, C., Martins-Silva, T., Carpena, M. X., Del-Ponte, B., Blumenberg, C., Martins, R. C., Dias, I. M., Terribele, F. B., de Avila, A. B., Marmitt, L. P., Meucci, R., & Cesar, J. A. (2021). Maternal mental health before and during the COVID-19 pandemic in the 2019 Rio Grande birth cohort. *Revista brasileira de psiquiatria (Sao Paulo, Brazil : 1999)*. <https://doi.org/10.1590/1516-4446-2020-1673>
32. Martinez, E. Z., Silva, F. M., Morigi, T. Z., Zucoloto, M. L., Silva, T. L., Joaquim, A. G., Dallagnol, G., Galdino, G., Martinez, M. O. Z., & Silva, W. R. da. (2020). Physical activity in periods of social distancing due to COVID-19: A cross-sectional survey^ienAtividade física em períodos de distanciamento social

- devidos à COVID-19: Um estudo transversal<sup>ipt</sup>. *Ciênc. Saúde Colet*, 25(supl.2), 4157-4168.
33. Meda-Lara, R. M., Muñoz-Valle, J. F., Juárez-Rodríguez, P., Figueroa-López, C., Herrero, M., de Santos Ávila, F., Palomera-Chávez, A., Yeo Ayala, C., & Moreno-Jiménez, B. (2021). Psychological responses to COVID-19 in a Mexican population: An exploratory study during second and third phases. *Psychology, health & medicine*, 1-8.  
<https://doi.org/10.1080/13548506.2021.1883689>
34. Miranda, A. R., Scotta, A. V., Cortez, M. V., & Soria, E. A. (2021). Triggering of postpartum depression and insomnia with cognitive impairment in Argentinian women during the pandemic COVID-19 social isolation in relation to reproductive and health factors. *Midwifery*, 102, 103072.  
<https://doi.org/10.1016/j.midw.2021.103072>
35. Montero Doig, A. M., Torres, G. Y., & Correa-Lopez, L. E. (2021). Resilience, anxiety and eating habits of the south-east amazon population before and during the pandemic. *Revista de la Facultad de Medicina Humana*, 21(3), 557-563.  
<https://doi.org/10.25176/RFMH.V21I3.3732>
36. Monterrosa-Blanco, A., Monterrosa-Castro, Á., & González-Sequeda, A. (2021). Online assessment of the perception of loneliness and associated factors in Colombian climacteric women during the COVID-19 pandemic: A cross-sectional study. *Health Promotion Perspectives*, 11(2), 230-239.  
<https://doi.org/10.34172/hpp.2021.28>
37. Monterrosa-Castro, Á., Monterrosa-Blanco, A., & González-Sequeda, A. (2021). Perceived Loneliness and Severe Sleep Disorders in Adult Women during the Covid-19 Quarantine: A Cross-Sectional Study in Colombia. *Journal*



- of Primary Care & Community Health*, 1-8.  
<https://doi.org/10.1177/21501327211025170>
38. Naranjo-Hernández, Y., Mayor-Walton, S., Rivera-García, O. de la, & González-Bernal, R. (2021). Estados emocionales de adultos mayores en aislamiento social durante la COVID-19^iesEmotional states of older adults in social isolation during COVID-19^ienEstados emocionais de idosos em isolamento social durante COVID-19^ipt. *Rev. inf. cient*, 100(2). [es](#)
39. Nomura, R., Tavares, I., Ubinha, A. C., Costa, M. L., Opperman, M. L., Brock, M., Trapani, A., Damasio, L., Reis, N., Borges, V., Zaconeta, A., Araujo, A. C., & Ruano, R. (2021). Impact of the covid-19 pandemic on maternal anxiety in Brazil. *Journal of Clinical Medicine*, 10(4), 1-14.  
<https://doi.org/10.3390/jcm10040620>
40. Oblitas González Correo, A., & Sempertegui Sánchez Correo, N. (2020). Ansiedad en tiempos de aislamiento social por COVID-19. Chota, Perú, 2020. *Avances en Enfermería*, 38, 11-21.  
<https://doi.org/10.15446/av.enferm.v38n2.87589>
41. Paico, N. I. H., Sebastian, S. D., Vergaray, J. M., Arellano, E. G. R., & Navarro, E. R. (2021). Anxiety and aggressiveness in Peruvian postgraduate students in COVID-19 context. *European Journal of Molecular and Clinical Medicine*, 8(3), 713-726.
42. Passos, L., Prazeres, F., Teixeira, A., & Martins, C. (2020). Impact on mental health due to covid-19 pandemic: Cross-sectional study in portugal and brazil. *International Journal of Environmental Research and Public Health*, 17(18), 1-13. <https://doi.org/10.3390/ijerph17186794>

43. Pereira-Ávila, F. M. V., Lam, S. C., Goulart, M. de C. e L., Góes, F. G. B., Pereira-Caldeira, N. M. V., & Gir, E. (2021). Fatores associados aos sintomas de depressão entre idosos durante a pandemia da covid-19. *Texto & Contexto - Enfermagem*, 30. <https://doi.org/10.1590/1980-265X-TCE-2020-0380>
44. Pérez-Cano, H. J., Moreno-Murguía, M. B., Morales-López, O., Crow-Buchanan, O., English, J. A., Lozano-Alcázar, J., & Somilleda-Ventura, S. A. (2020). Anxiety, depression, and stress in response to the coronavirus disease-19 pandemic. *Cirugia y Cirujanos (English Edition)*, 88(5), 562-568. <https://doi.org/10.24875/CIRU.20000561>
45. Porter, C., Favara, M., Hittmeyer, A., Scott, D., Sánchez Jiménez, A., Ellanki, R., Woldehanna, T., Duc, L. T., Craske, M. G., & Stein, A. (2021). Impact of the COVID-19 pandemic on anxiety and depression symptoms of young people in the global south: Evidence from a four-country cohort study. *BMJ Open*, 11(4). <https://doi.org/10.1136/bmjopen-2021-049653>
46. Puccinelli, P. J., Costa, T. S., Seffrin, A., de Lira, C. A. B., Vancini, R. L., Knechtle, B., Nikolaidis, P. T., & Andrade, M. S. (2021). Physical Activity Levels and Mental Health during the COVID-19 Pandemic: Preliminary Results of a Comparative Study between Convenience Samples from Brazil and Switzerland. *Medicina (Kaunas, Lithuania)*, 57(1). <https://doi.org/10.3390/medicina57010048>
47. Puccinelli, P. J., da Costa, T. S., Seffrin, A., de Lira, C. A. B., Vancini, R. L., Nikolaidis, P. T., Knechtle, B., Rosemann, T., Hill, L., & Andrade, M. S. (2021). Reduced level of physical activity during COVID-19 pandemic is associated with depression and anxiety levels: An internet-based survey. *BMC Public Health*, 21(1), 1-11. <https://doi.org/10.1186/s12889-021-10470-z>

48. Quiroga-Garza, A., Cepeda-Lopez, A. C., Villarreal Zambrano, S., Villalobos-Daniel, V. E., Carreno, D. F., & Eisenbeck, N. (2021). How Having a Clear Why Can Help Us Cope With Almost Anything: Meaningful Well-Being and the COVID-19 Pandemic in México. *Front Psychol*, *12*, 648069.  
<https://doi.org/10.3389/fpsyg.2021.648069>
49. Ramírez-Coronel, A. A., Cárdenas-Castillo, P. F., Martínez-Suárez, P. C., Yambay-Bautista, X. R., Mesa-Cano, I. C., Minchala-Urgilés, R. E., Andrade-Molina, M. C., Sarmiento-Pesántez, M. M., González-León, F. M., Pogoyo-Morocho, G. L., Cárdenas-Cordero, A. J., Cordero-Zumba, N. B., Pogoyo-Morocho, M. V., Faicán-Rocano, P. F., & Arcos-Coronel, F. E. (2020). Psychological impact of covid-19 confinement towards a new anxiety-depressive clinimetric construct in adult women of azogues. *Archivos Venezolanos de Farmacología y Terapéutica*, *39*(8), 923-934.  
<https://doi.org/10.5281/zenodo.4542465>
50. Ramos-Padilla, P., Villavicencio-Barriga, V. D., Cárdenas-Quintana, H., Abril-Merizalde, L., Solís-Manzano, A., & Carpio-Arias, T. V. (2021). Eating habits and sleep quality during the covid-19 pandemic in adult population of Ecuador. *International Journal of Environmental Research and Public Health*, *18*(7).  
<https://doi.org/10.3390/ijerph18073606>
51. Ribeiro, F. S., Santos, F. H., Anunciação, L., Barrozo, L., Landeira-Fernandez, J., & Leist, A. K. (2021). Exploring the frequency of anxiety and depression symptoms in a brazilian sample during the covid-19 outbreak. *International Journal of Environmental Research and Public Health*, *18*(9).  
<https://doi.org/10.3390/ijerph18094847>

52. Riter, H. da S., Almeida, M. L., Vescovi, G., Marques, F. M., Pedrotti, B. G., Mallmann, M. Y., Pieta, M. A. M., & Frizzo, G. B. (2021). Symptoms of common mental disorders in Brazilian parents during the COVID-19 pandemic: Associated factors. *Psychological Studies*, No-Specified. <https://doi.org/10.1007/s12646-021-00609-8>
53. Ruiz-Frutos, C., Palomino-Baldeón, J. C., Ortega-Moreno, M., Villavicencio-Guardia, M. D. C., Dias, A., Bernardes, J. M., & Gómez-Salgado, J. (2021). Effects of the COVID-19 Pandemic on Mental Health in Peru: Psychological Distress. *Healthcare (Basel)*, 9(6). <https://doi.org/10.3390/healthcare9060691>
54. Schmitt, A. A., Brenner, A. M., Primo de Carvalho Alves, L., Claudino, F. C. de A., Fleck, M. P. de A., Rocha, N. S., & Schmitt, A. A., Jr. (2021). Potential predictors of depressive symptoms during the initial stage of the COVID-19 outbreak among Brazilian adults. *Journal of Affective Disorders*, 282, 1090-1095. <https://doi.org/10.1016/j.jad.2020.12.203>
55. Scotta, A. V., Cortez, M. V., & Miranda, A. R. (2020). Insomnia is associated with worry, cognitive avoidance and low academic engagement in Argentinian university students during the COVID-19 social isolation. *Psychology, health & medicine*, 1-16. <https://doi.org/10.1080/13548506.2020.1869796>
56. Seco Ferreira, D. C., Oliveira, W. L., Costa Delabrida, Z. N., Faro, A., & Cerqueira-Santos, E. (2020). Intolerance of uncertainty and mental health in Brazil during the COVID-19 pandemic. *Intolerância a incerteza e saúde mental no Brasil durante a pandemia de COVID-19*. *Suma psicol*, 27(1), 62-69.
57. Serafim, A. P., Durães, R. S. S., Rocca, C. C. A., Gonçalves, P. D., Saffi, F., Cappellozza, A., Paulino, M., Dumas-Diniz, R., Brissos, S., Brites, R., Alho, L., & Lotufo-Neto, F. (2021). Exploratory study on the psychological impact of

- COVID-19 on the general Brazilian population. *PLoS ONE*, 16(2 February).  
<https://doi.org/10.1371/journal.pone.0245868>
58. Silva, L. R. B., Seguro, C. S., de Oliveira, C. G. A., Santos, P. O. S., de Oliveira, J. C. M., de Souza Filho, L. F. M., de Paula Júnior, C. A., Gentil, P., & Rebelo, A. C. S. (2020). Physical Inactivity Is Associated With Increased Levels of Anxiety, Depression, and Stress in Brazilians During the COVID-19 Pandemic: A Cross-Sectional Study. *Frontiers in Psychiatry*, 11.  
<https://doi.org/10.3389/fpsyt.2020.565291>
59. Soares, L. L., Leite, L. B., Guilherme, L. Q., Rezende, L. M., Noce, F., & Pussieldi, G. (2021). Anxiety, sleep quality and mood in elite athletes during the COVID-19 pandemic: A preliminary study. *J Sports Med Phys Fitness*.  
<https://doi.org/10.23736/s0022-4707.21.12276-5>
60. Souza, A. S. R., Souza, G. F. A., Souza, G. A., Cordeiro, A. L. N., Praciano, G. A. F., Alves, A. C. S., Santos, A. C. D., Silva Junior, J. R., & Souza, M. B. R. (2021). Factors associated with stress, anxiety, and depression during social distancing in Brazil. *Revista de saude publica*, 55, 5.  
<https://doi.org/10.11606/s1518-8787.2021055003152>
61. Stults-Kolehmainen, M., Filgueiras, A., & Blacutt, M. (2021). Factors linked to changes in mental health outcomes among Brazilians in quarantine due to COVID-19. *medRxiv*, 2020.05.12.20099374.  
<https://doi.org/10.1101/2020.05.12.20099374>
62. Suárez-Rico, B. V., Estrada-Gutierrez, G., Sánchez-Martínez, M., Perichart-Perera, O., Rodríguez-Hernández, C., González-Leyva, C., Osorio-Valencia, E., Cardona-Pérez, A., Helguera-Repetto, A. C., Sosa, S. E. Y., Solis-Paredes, M., & Reyes-Muñoz, E. (2021). Prevalence of depression, anxiety, and perceived

- stress in postpartum mexican women during the covid-19 lockdown.  
*International Journal of Environmental Research and Public Health*, 18(9).  
<https://doi.org/10.3390/ijerph18094627>
63. Terán-Pérez, G., Portillo-Vásquez, A., Arana-Lechuga, Y., Sánchez-Escandón, O., Mercadillo-Caballero, R., González-Robles, R. O., & Velázquez-Moctezuma, J. (2021). Sleep and mental health disturbances due to social isolation during the covid-19 pandemic in Mexico. *International Journal of Environmental Research and Public Health*, 18(6), 1-11.  
<https://doi.org/10.3390/ijerph18062804>
64. Toledo-Fernández, A., Betancourt-Ocampo, D., & González-González, A. (2021). Distress, Depression, Anxiety, and Concerns and Behaviors Related to COVID-19 during the First Two Months of the Pandemic: A Longitudinal Study in Adult MEXICANS. *Behav Sci (Basel)*, 11(5).  
<https://doi.org/10.3390/bs11050076>
65. Torales, J., Ríos-González, C., Barrios, I., O'Higgins, M., González, I., García, O., Castaldelli-Maia, J. M., & Ventriglio, A. (2020). Self-Perceived Stress During the Quarantine of COVID-19 Pandemic in Paraguay: An Exploratory Survey. *Frontiers in Psychiatry*, 11. <https://doi.org/10.3389/fpsy.2020.558691>
66. Torrente, F., Yoris, A., Low, D. M., Lopez, P., Bekinschtein, P., Manes, F., & Cetkovich, M. (2021). Sooner than you think: A very early affective reaction to the COVID-19 pandemic and quarantine in Argentina. *Journal of Affective Disorders*, 282, 495-503. <https://doi.org/10.1016/j.jad.2020.12.124>
67. Torrente, F., Yoris, A., Low, D. M., Lopez, P. L., Bekinschtein, P., Vázquez, G., Manes, F., & Cetkovich, M. (2021). Emotional symptoms, mental fatigue and behavioral adherence after 72 continuous days of strict lockdown during the

- COVID-19 pandemic in Argentina. *medRxiv*, 2021.04.21.21255866.  
<https://doi.org/10.1101/2021.04.21.21255866>
68. Tyler, C. M., McKee, G. B., Alzueta, E., Perrin, P. B., Kingsley, K., Baker, F. C., & Arango-Lasprilla, J. C. (2021). A study of older adults' mental health across 33 countries during the covid-19 pandemic. *International Journal of Environmental Research and Public Health*, 18(10).  
<https://doi.org/10.3390/ijerph18105090>
69. Vitorino, L. M., Yoshinari Júnior, G. H., Gonzaga, G., Dias, I. F., Pereira, J. P. L., Ribeiro, I. M. G., França, A. B., Al-Zaben, F., Koenig, H. G., & Trzesniak, C. (2021). Factors associated with mental health and quality of life during the COVID-19 pandemic in Brazil. *BJPsych Open*, 7(3).  
<https://doi.org/10.1192/bjo.2021.62>
70. Vizioli, N. A., & Crespi, M. (2021). Factores estresantes y sintomatología psicológica durante el Aislamiento Social Preventivo Obligatorio por COVID-19 en población adulta de Buenos Aires / Stressors and Psychological Symptoms during Social, Preventive and Mandatory Isolation for COVID-19. *Subj. procesos cogn*, 24(2), 17-41.
71. Zhang, S. X., Wang, Y., Jahanshahi, A. A., Li, J., & Schmitt, V. G. H. (2021). Early evidence and predictors of mental distress of adults one month in the COVID-19 epidemic in Brazil. *Journal of Psychosomatic Research*, 142, N.PAG-N.PAG. <https://doi.org/10.1016/j.jpsychores.2021.110366>
